# Supplementary material
Source: MDPI journal article supplement (https://www.mdpi.com/2072-4292/11/1/48)

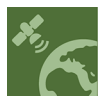

# Satellite Remote Sensing of Surface Urban Heat Islands: Progress, Challenges, and Perspectives

Decheng Zhou <sup>1,\*</sup>, Jingfeng Xiao <sup>2,\*</sup>, Stefania Bonafoni <sup>3</sup>, Christian Berger <sup>4</sup>, Kaveh Deilami <sup>5</sup>, Yuyu Zhou <sup>6</sup>, Steve Frolking <sup>2</sup>, Rui Yao <sup>7</sup>, Zhi Qiao <sup>8</sup> and José A. Sobrino <sup>9</sup>

<sup>1</sup> Jiangsu Key Laboratory of Agricultural Meteorology, Nanjing University of Information Science and Technology, Nanjing 210044, China

<sup>2</sup> Earth Systems Research Center, Institute for the Study of Earth, Oceans, and Space, University of New Hampshire, Durham, NH 03824, USA; steve.frolking@unh.edu

<sup>3</sup> Department of Engineering, University of Perugia, via G. Duranti 93, 06125 Perugia, Italy; stefania.bonafoni@unipg.it

<sup>4</sup> Department for Earth Observation, Friedrich-Schiller-Universität Jena, Löbdergraben 32, 07743 Jena, Germany; christian.berger@uni-jena.de

<sup>5</sup> School of Earth and Environmental Sciences, The University of Queensland, Brisbane, 4072 QLD, Australia; k.deilami@uq.edu.au

<sup>6</sup> Department of Geological and Atmospheric Sciences, Iowa State University, Ames, 50011 IA, USA; yuyuzhou@iastate.edu

<sup>7</sup> Laboratory of Critical Zone Evolution, School of Earth Sciences, China University of Geosciences, Wuhan 430074, China; 1201610162@cug.edu.cn

<sup>8</sup> Key Lab. of Indoor Air Environment Quality Control, School of Environmental Science and Engineering, Tianjin University, Weijin Road 92, Tianjin, 300072, China; qiaozhi@tju.edu.cn

<sup>9</sup> Global Change Unit, Department of Thermodynamics, Faculty of Physics, University of Valencia, Valencia E-46071, Spain; Jose.Sobrino@uv.es

\* Correspondence: zhoudc@nuist.edu.cn (D.Z.); j.xiao@unh.edu (J.X.); Tel: +86-25-58731539 (D.Z.); +1-603-862-1873 (J.X.)

---

## List of supporting materials

- Text S1: The active journals in publishing SUHI papers
- Table S1: List of the selected publications reviewed in this study

### Text S1. The active journals in publishing SUHI papers

SUHI-related researches were published in 107 different journals, suggesting a wide variety of interests of scholars from various disciplines. However, those papers were highly focused on a limited number of journals (Figure S1), particularly those in the fields of remote sensing, environment, urban landscape, and sustainability. The three dominant journals—*Remote Sensing of Environment*, *Remote Sensing*, and *International Journal of Remote Sensing*—published 123 or 25% of the total 492 articles from 1972 to the present. Papers published in the top 20 most active journals accounted for 65.4% of the total publications. Interestingly, the meteorological and atmospheric journals such as *International Journal of Climatology*, *Journal of Applied and Meteorology Climatology*, *Atmospheric Environment*, and *Journal of Geophysical Research: Atmospheres* published very few SUHI papers, though they were most productive in publishing air UHI researches [1].

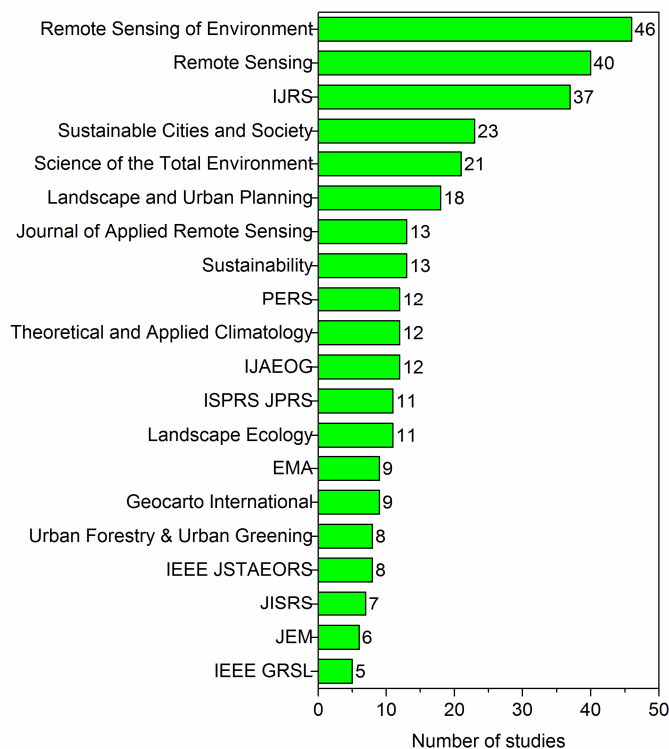

**Figure S1.** Top 20 active journals of the 107 journals for the selected SUHI studies. IJRS, International Journal of Remote Sensing; PERS, Photogrammetric Engineering and Remote Sensing; IJAEOG, International Journal of Applied Earth Observation and Geoinformation; ISPRS JPRS, ISPRS Journal of Photogrammetry and Remote Sensing; EMA, Environmental Monitoring and Assessment; IEEE JSTAEORS, IEEE Journal of Selected Topics in Applied Earth Observations and Remote Sensing; JISRS, Journal of the Indian Society of Remote Sensing; JEM, Journal of environmental management; IEEE GRSL, IEEE Geoscience and Remote Sensing Letters.

### References

1. Huang, Q.; Lu, Y. Urban heat island research from 1991 to 2015: A bibliometric analysis. *Theoretical and Applied Climatology* **2018**, *131*, 1055-1067.

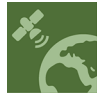

**Table S1.** List of the selected publications reviewed in this study

| No. | Year | Authors                                                                   | Title                                                                                                               | Journal                                          | Sensor | Research foci                | Study scale | Time-of-day   | Study Season  |
|-----|------|---------------------------------------------------------------------------|---------------------------------------------------------------------------------------------------------------------|--------------------------------------------------|--------|------------------------------|-------------|---------------|---------------|
| 1   | 1972 | P. K. Rao                                                                 | Remote sensing of urban" heat islands" from an environmental satellite                                              | Bulletin of the American meteorological society  | ITOS-I | SUHI variations among cities | Regional    | Not available | Not available |
| 2   | 1977 | T. N. Carlson, J. A. Augustine and F. E. Boland                           | Potential Application of Satellite Temperature Measurements in the Analysis of Land Use over Urban Areas            | Bulletin of the American Meteorological Society  | AHVR   | local-scale SUHI variations  | Local       | Day and night | Summer        |
| 3   | 1978 | M. Matson, E. P. McClain, D. F. McGinnis and J. A. Pritchard              | Satellite Detection of Urban Heat Islands                                                                           | Monthly Weather Review                           | AHVR   | SUHI variations among cities | Regional    | Nighttime     | Summer        |
| 4   | 1979 | J. C. Price                                                               | Assessment of the Urban Heat Island Effect Through the Use of Satellite Data                                        | Monthly Weather Review                           | HCMM   | SUHI variations among cities | Regional    | Daytime       | Summer        |
| 5   | 1980 | M. Matson and R. V. Legeckis                                              | Urban Heat Islands Detected by Satellite                                                                            | Bulletin of the American Meteorological Society  | AHVR   | SUHI variations among cities | Regional    | Not available | Not available |
| 6   | 1981 | Toby N. Carlson, Joseph K. Dodd, Stanley G. Benjamin, and James N. Cooper | Satellite Estimation of the Surface Energy Balance, Moisture Availability and Thermal Inertia                       | Journal of Applied Meteorology                   | HCMM   | local-scale SUHI variations  | Local       | Day and night | Spring        |
| 7   | 1981 | J. L. Foster J. P. Ormsby R. J. Gurney                                    | Satellite observations of England and north-western Europe                                                          | Weather                                          | HCMM   | local-scale SUHI variations  | Regional    | Day and night | Summer        |
| 8   | 1983 | Fred M. Vukovich                                                          | An analysis of the ground temperature and reflectivity pattern about St. Louis, Missouri, using HCMM satellite data | Journal of Climate and Applied Meteorology       | HCMM   | local-scale SUHI variations  | Local       | Day and night | All seasons   |
| 9   | 1987 | S. Q. Kidder and H.-T. Wu                                                 | A multispectral study of the St. Louis area under snow-covered conditions using NOAA-7 AVHRR data                   | Remote Sensing of Environment                    | AHVR   | local-scale SUHI variations  | Local       | Day and night | Winter        |
| 10  | 1988 | R. C. Balling and S. W. Brazel                                            | High-resolution surface temperature patterns in a complex urban terrain                                             | Photogrammetric engineering and remote sensing   | AHVR   | local-scale SUHI variations  | Local       | Nighttime     | Summer        |
| 11  | 1989 | R. C. Balling and S. W. Brazel                                            | High-Resolution Nighttime Temperature Patterns in Phoenix                                                           | Journal of the Arizona-Nevada Academy of Science | AHVR   | local-scale SUHI variations  | Local       | Nighttime     | Summer        |

| No. | Year | Authors                                                                         | Title                                                                                                                        | Journal                                                                                  | Sensor         | Research foci                | Study scale | Time-of-day   | Study Season           |
|-----|------|---------------------------------------------------------------------------------|------------------------------------------------------------------------------------------------------------------------------|------------------------------------------------------------------------------------------|----------------|------------------------------|-------------|---------------|------------------------|
| 12  | 1989 | J. A. Henry                                                                     | Comparison of satellite, ground-based, and modeling techniques for analyzing the urban heat island                           | Photogrammetric Engineering and Remote Sensing                                           | HCMM           | Others                       | Local       | Daytime       | Spring, Autumn, Winter |
| 13  | 1989 | M. Roth, T. R. Oke and W. J. Emery                                              | Satellite-derived urban heat islands from three coastal cities and the utilization of such data in urban climatology         | International Journal of Remote Sensing                                                  | AHVR           | local-scale SUHI variations  | Regional    | Day and night | All seasons            |
| 14  | 1989 | Dousset                                                                         | AVHRR-derived cloudiness and surface temperature patterns over the Los Angeles area and their relationship to land use       | Proc., 12th Canadian Symposium on Remote Sensing Geoscience and Remote Sensing Symposium | AHVR           | local-scale SUHI variations  | Local       | Day and night | Summer                 |
| 15  | 1990 | W. H. Carnahan and R. C. Larson                                                 | An analysis of an urban heat sink                                                                                            | Remote Sensing of Environment                                                            | Landsat series | local-scale SUHI variations  | Local       | Daytime       | Spring                 |
| 16  | 1991 | V. Caselles, M. J. López García, J. Meliá and A. J. Pérez Cueva                 | Analysis of the heat-island effect of the city of Valencia, Spain, through air temperature transects and NOAA satellite data | Theoretical and Applied Climatology                                                      | AHVR           | surface-air UHIs             | Local       | Nighttime     | Winter                 |
| 17  | 1991 | Dousset                                                                         | Surface temperature statistics over Los Angeles: the influence of land use                                                   | Proc., [Proceedings] IGARSS'91 Remote Sensing: Global Monitoring for Earth Management    | AHVR           | local-scale SUHI variations  | Local       | Day and night | Summer                 |
| 18  | 1992 | H. H. Kim                                                                       | Urban heat island                                                                                                            | International Journal of Remote Sensing                                                  | Landsat series | local-scale SUHI variations  | Local       | Daytime       | Summer                 |
| 19  | 1993 | K. P. Gallo, A. L. McNab, T. R. Karl, J. F. Brown, J. J. Hood and J. D. Tarpley | The Use of NOAA AVHRR Data for Assessment of the Urban Heat Island Effect                                                    | Journal of Applied Meteorology                                                           | AHVR           | SUHI variations among cities | Regional    | Daytime       | Summer                 |
| 20  | 1993 | K. P. Gallo, A. L. McNab, T. R. Karl, J. F. Brown, J. J. Hood and J. D. Tarpley | The use of a vegetation index for assessment of the urban heat island effect                                                 | International Journal of Remote Sensing                                                  | AHVR           | local-scale SUHI variations  | Local       | Daytime       | Summer                 |
| 21  | 1993 | H.-Y. Lee                                                                       | An application of NOAA AVHRR thermal data to the study of urban heat islands                                                 | Atmospheric Environment. Part B. Urban Atmosphere                                        | AHVR           | SUHI variations among cities | Regional    | Daytime       | Spring, Winter         |

| No. | Year | Authors                                         | Title                                                                                                                | Journal                                         | Sensor         | Research foci                | Study scale | Time-of-day   | Study Season |
|-----|------|-------------------------------------------------|----------------------------------------------------------------------------------------------------------------------|-------------------------------------------------|----------------|------------------------------|-------------|---------------|--------------|
| 22  | 1994 | S. Kawashima                                    | Relation between vegetation, surface temperature, and surface composition in the Tokyo region during winter          | Remote Sensing of Environment                   | Landsat series | local-scale SUHI variations  | Local       | Day and night | Winter       |
| 23  | 1994 | J. E. Nichol                                    | A GIS-based approach to microclimate monitoring in Singapore's high-rise housing estates                             | Photogrammetric Engineering and Remote Sensing  | Landsat series | surface-air UHIs             | Local       | Daytime       | Summer       |
| 24  | 1995 | C. Aniello, K. Morgan, A. Busbey and L. Newland | Mapping micro-urban heat islands using LANDSAT TM and a GIS                                                          | Computers & Geosciences                         | Landsat series | local-scale SUHI variations  | Local       | Daytime       | Autumn       |
| 25  | 1996 | K. P. Gallo and J. D. Tarpley                   | The comparison of vegetation index and surface temperature composites for urban heat-island analysis                 | International Journal of Remote Sensing         | AHVR           | SUHI variations among cities | Regional    | Daytime       | Summer       |
| 26  | 1996 | J. E. Nichol                                    | High-Resolution Surface Temperature Patterns Related to Urban Morphology in a Tropical City: A Satellite-Based Study | Journal of Applied Meteorology                  | Landsat series | local-scale SUHI variations  | Local       | Daytime       | Autumn       |
| 27  | 1996 | J. E. Nichol                                    | Analysis of the Urban Thermal Environment with LANDSAT Data                                                          | Environment and Planning B: Planning and Design | Landsat series | surface-air UHIs             | Local       | Daytime       | Spring       |
| 28  | 1996 | Lougeay, R., Brazel, A., and Hubble, M.         | Monitoring intra-urban temperature patterns and associated land cover in Phoenix, Arizona using Landsat thermal data | Geocarto International                          | Landsat series | local-scale SUHI variations  | Local       | Daytime       | Summer       |
| 29  | 1997 | C. P. Lo                                        | Application of LandSat TM data for quality of life assessment in an urban environment                                | Computers, Environment and Urban Systems        | Landsat series | Others                       | Local       | Daytime       | Summer       |
| 30  | 1997 | Larson, R. C., & Carnahan, W. H                 | The influence of surface characteristics on urban radiant temperatures                                               | Geocarto International                          | Landsat series | local-scale SUHI variations  | Local       | Daytime       | Spring       |
| 31  | 1998 | K. P. Gallo and T. W. Owen                      | Assessment of urban heat Islands: A multi-sensor perspective for the Dallas-Ft. worth, USA region                    | Geocarto International                          | AHVR           | Others                       | Local       | Daytime       | Summer       |
| 32  | 1998 | J. E. Nichol                                    | Visualisation of urban surface temperatures derived from satellite images                                            | International Journal of Remote Sensing         | Landsat series | Others                       | Local       | Daytime       | Spring       |

| No. | Year | Authors                                                          | Title                                                                                                                             | Journal                                            | Sensor         | Research foci                | Study scale | Time-of-day   | Study Season           |
|-----|------|------------------------------------------------------------------|-----------------------------------------------------------------------------------------------------------------------------------|----------------------------------------------------|----------------|------------------------------|-------------|---------------|------------------------|
| 33  | 1998 | T. W. Owen, T. N. Carlson and R. R. Gillies                      | An assessment of satellite remotely-sensed land cover parameters in quantitatively describing the climatic effect of urbanization | International Journal of Remote Sensing            | AHVRR          | Others                       | Local       | Daytime       | Summer                 |
| 34  | 1999 | K. P. Gallo and T. W. Owen                                       | Satellite-Based Adjustments for the Urban Heat Island Temperature Bias                                                            | Journal of Applied Meteorology                     | AHVRR          | SUHI variations among cities | Regional    | Daytime       | Summer, Autumn         |
| 35  | 1999 | Carlson, T. N., and Sanchez-Azofeifa, G. A.                      | Satellite Remote Sensing of Land Use Changes in and around San José, Costa Rica                                                   | Remote Sensing of Environment                      | AHVRR          | local-scale SUHI variations  | Local       | Daytime       | Spring, Winter         |
| 36  | 2000 | T. N. Carlson and S. Traci Arthur                                | The impact of land use — land cover changes due to urbanization on surface microclimate and hydrology: a satellite perspective    | Global and Planetary Change                        | AHVRR          | local-scale SUHI variations  | Local       | Daytime       | Summer                 |
| 37  | 2001 | Q. Weng                                                          | A remote sensing — GIS evaluation of urban expansion and its impact on surface temperature in the Zhujiang Delta, China           | International Journal of Remote Sensing            | Landsat series | SUHI variations among cities | Regional    | Daytime       | Summer, Winter         |
| 38  | 2002 | D. R. Streutker                                                  | A remote sensing study of the urban heat island of Houston, Texas                                                                 | International Journal of Remote Sensing            | AHVRR          | Others                       | Local       | Nighttime     | All seasons            |
| 39  | 2002 | Gallo, K. P., & Owen, T. W.                                      | A sampling strategy for satellite sensorbased assessment of the urban heat-island bias.                                           | International Journal of Remote Sensing            | AHVRR          | Others                       | Local       | Daytime       | Annual mean            |
| 40  | 2003 | B. Dousset and F. Gourmelon                                      | Satellite multi-sensor data analysis of urban surface temperatures and landcover                                                  | ISPRS Journal of Photogrammetry and Remote Sensing | AHVRR          | local-scale SUHI variations  |             | Day and night | Summer                 |
| 41  | 2003 | C. P. Lo                                                         | Land-Use and Land-Cover Change, Urban Heat Island Phenomenon, and Health Implications                                             | Photogrammetric engineering and remote sensing     | Landsat series | local-scale SUHI variations  | Local       | Daytime       | Spring, Summer         |
| 42  | 2003 | D. R. Streutker                                                  | Satellite-measured growth of the urban heat island of Houston, Texas                                                              | Remote Sensing of Environment                      | AHVRR          | local-scale SUHI variations  | Local       | Nighttime     | All seasons            |
| 43  | 2003 | Q. H. Weng                                                       | Fractal analysis of satellite-detected urban heat island effect                                                                   | Photogrammetric Engineering and Remote Sensing     | Landsat series | local-scale SUHI variations  | Local       | Daytime       | Spring, Summer, Winter |
| 44  | 2003 | J. S. Wilson, M. Clay, E. Martin, D. Stuckey and K. Vedder-Risch | Evaluating environmental influences of zoning in urban ecosystems with remote sensing                                             | Remote Sensing of Environment                      | Landsat series | local-scale SUHI variations  | Local       | Daytime       | Summer                 |

| No. | Year | Authors                                                                     | Title                                                                                                                                                                   | Journal                                        | Sensor                | Research foci                | Study scale | Time-of-day   | Study Season   |
|-----|------|-----------------------------------------------------------------------------|-------------------------------------------------------------------------------------------------------------------------------------------------------------------------|------------------------------------------------|-----------------------|------------------------------|-------------|---------------|----------------|
| 45  | 2004 | Q. Weng and S. Yang                                                         | Managing the adverse thermal effects of urban development in a densely populated Chinese city                                                                           | Journal of environmental management            | Landsat series        | local-scale SUHI variations  | Local       | Daytime       | Autumn         |
| 46  | 2004 | H.-q. Xu and B.-q. Chen                                                     | Remote sensing of the urban heat island and its changes in Xiamen City of SE China                                                                                      | Journal of environmental sciences (China)      | Landsat series        | local-scale SUHI variations  | Local       | Daytime       | Spring, Summer |
| 47  | 2004 | Weng, Q., Lu, D., and Schubring, J.                                         | Estimation of land surface temperature-vegetation abundance relationship for urban heat island studies                                                                  | Remote Sensing of Environment                  | Landsat series        | local-scale SUHI variations  | Local       | Daytime       | Summer         |
| 48  | 2004 | Zhang, X., Friedl, M. A., Schaaf, C. B., Strahler, A. H., and Schneider, A. | The footprint of urban climates on vegetation phenology                                                                                                                 | Geophysical Research Letters                   | MODIS                 | local-scale SUHI variations  | Regional    | Daytime       | All seasons    |
| 49  | 2005 | M. L. Jin, R. E. Dickinson and D. L. Zhang                                  | The footprint of urban areas on global climate as characterized by MODIS                                                                                                | Journal of Climate                             | MODIS                 | SUHI variations among cities | Global      | Day and night | Spring         |
| 50  | 2005 | S. Kato and Y. Yamaguchi                                                    | Analysis of urban heat-island effect using ASTER and ETM+ Data: Separation of anthropogenic heat discharge and natural heat radiation from sensible heat flux           | Remote Sensing of Environment                  | Landsat series, ASTER | local-scale SUHI variations  | Local       | Day and night | All seasons    |
| 51  | 2005 | J. Nichol                                                                   | Remote sensing of urban heat islands by day and night                                                                                                                   | Photogrammetric Engineering and Remote Sensing | Landsat series, ASTER | local-scale SUHI variations  | Local       | Day and night | Autumn         |
| 52  | 2005 | J. Nichol and M. S. Wong                                                    | Modeling urban environmental quality in a tropical city                                                                                                                 | Landscape and Urban Planning                   | Landsat series        | Others                       |             | Daytime       | Summer         |
| 53  | 2005 | J. H. Zhang, Y. Y. Hou, G. C. Li, H. Yan, L. M. Yang and F. M. Yao          | The diurnal and seasonal characteristics of urban heat island variation in Beijing city and surrounding areas and impact factors based on remote sensing satellite data | Science in China Series D-Earth Sciences       | MODIS                 | local-scale SUHI variations  | Local       | Day and night | All seasons    |
| 54  | 2006 | X.-L. Chen, H.-M. Zhao, P.-X. Li and Z.-Y. Yin                              | Remote sensing image-based analysis of the relationship between urban heat island and land use/cover changes                                                            | Remote Sensing of Environment                  | Landsat series        | local-scale SUHI variations  | Regional    | Daytime       | All seasons    |
| 55  | 2006 | D. A. Hartz, L. Prashad, B. C. Hedquist, J. Golden and A. J. Brazel         | Linking satellite images and hand-held infrared thermography to observed neighborhood climate conditions                                                                | Remote Sensing of Environment                  | ASTER                 | Others                       | Local       | Day and night | Summer         |

| No. | Year | Authors                                       | Title                                                                                                                                                             | Journal                                                               | Sensor         | Research foci                | Study scale | Time-of-day   | Study Season   |
|-----|------|-----------------------------------------------|-------------------------------------------------------------------------------------------------------------------------------------------------------------------|-----------------------------------------------------------------------|----------------|------------------------------|-------------|---------------|----------------|
| 56  | 2006 | T. Hung, D. Uchihama, S. Ochi and Y. Yasuoka  | Assessment with satellite data of the urban heat island effects in Asian mega cities                                                                              | International Journal of Applied Earth Observation and Geoinformation | MODIS          | SUHI variations among cities | Regional    | Day and night | All seasons    |
| 57  | 2006 | D. Lu and Q. Weng                             | Spectral mixture analysis of ASTER images for examining the relationship between urban thermal features and biophysical descriptors in Indianapolis, Indiana, USA | Remote Sensing of Environment                                         | ASTER          | local-scale SUHI variations  | Local       | Daytime       | Summer, Autumn |
| 58  | 2006 | R. Pongracz, J. Bartholy and Z. Dezso         | Remotely sensed thermal information applied to urban climate analysis                                                                                             | Advances in Space Research                                            | MODIS          | local-scale SUHI variations  |             | Day and night | All seasons    |
| 59  | 2006 | R. Pu, P. Gong, R. Michishita and T. Sasagawa | Assessment of multi-resolution and multi-sensor data for urban surface temperature retrieval                                                                      | Remote Sensing of Environment                                         | MODIS, ASTER   | local-scale SUHI variations  | Local       | Daytime       | Spring         |
| 60  | 2006 | L.-X. Qian, H.-S. Cui and C. Jie              | Impacts of land use and cover change on land surface temperature in the Zhujiang Delta                                                                            | Pedosphere                                                            | Landsat series | SUHI variations among cities | Regional    | Daytime       | Autumn         |
| 61  | 2006 | C. Small                                      | Comparative analysis of urban reflectance and surface temperature                                                                                                 | Remote Sensing of Environment                                         | Landsat series | local-scale SUHI variations  |             | Daytime       | Not available  |
| 62  | 2006 | Q. Weng, D. Lu and B. Liang                   | Urban surface biophysical descriptors and land surface temperature variations                                                                                     | Photogrammetric Engineering and Remote Sensing                        | Landsat series | local-scale SUHI variations  | Local       | Daytime       | Summer         |
| 63  | 2006 | Q. Weng and S. Yang                           | Urban air pollution patterns, land use, and thermal landscape: An examination of the linkage using GIS                                                            | Environmental Monitoring and Assessment                               | Landsat series | Others                       |             | Daytime       | Summer, Winter |
| 64  | 2006 | G. Xian and M. Crane                          | An analysis of urban thermal characteristics and associated land cover in Tampa Bay and Las Vegas using Landsat satellite data                                    | Remote Sensing of Environment                                         | Landsat series | local-scale SUHI variations  | Local       | Daytime       | Not available  |
| 65  | 2007 | Y. Chen, D. Z. Sui, T. Fung and W. Dou        | Fractal analysis of the structure and dynamics of a satellite-detected urban heat island                                                                          | International Journal of Remote Sensing                               | Landsat series | Others                       | Local       | Daytime       | Summer, Autumn |
| 66  | 2007 | Y. Du, Z. Xie, Y. Zeng, Y. Shi and J. Wu      | Impact of urban expansion on regional temperature change in the Yangtze River Delta                                                                               | Journal of Geographical Sciences                                      | AHVR, MODIS    | SUHI variations among cities | Regional    | Day and night | All seasons    |



| No. | Year | Authors                                                                          | Title                                                                                                                                                                   | Journal                                     | Sensor         | Research foci                | Study scale | Time-of-day   | Study Season   |
|-----|------|----------------------------------------------------------------------------------|-------------------------------------------------------------------------------------------------------------------------------------------------------------------------|---------------------------------------------|----------------|------------------------------|-------------|---------------|----------------|
| 67  | 2007 | G. D. Jenerette, S. L. Harlan, A. Brazel, N. Jones, L. Larsen and W. L. Stefanov | Regional relationships between surface temperature, vegetation, and human settlement in a rapidly urbanizing ecosystem                                                  | Landscape Ecology                           | Landsat series | local-scale SUHI variations  | Local       | Daytime       | Spring         |
| 68  | 2007 | S. Kato and Y. Yamaguchi                                                         | Estimation of storage heat flux in an urban area using ASTER data                                                                                                       | Remote Sensing of Environment               | ASTER          | local-scale SUHI variations  | Local       | Day and night | Spring, Winter |
| 69  | 2007 | L. M. Santana                                                                    | Landsat ETM+ image applications to extract information for environmental planning in a Colombian city                                                                   | International Journal of Remote Sensing     | Landsat series | local-scale SUHI variations  | Local       | Daytime       | Summer         |
| 70  | 2007 | M. Stathopoulou and C. Cartalis                                                  | Daytime urban heat islands from Landsat ETM+ and Corine land cover data: An application to major cities in Greece                                                       | Solar Energy                                | Landsat series | SUHI variations among cities | Regional    | Daytime       | Summer         |
| 71  | 2007 | K. Wang, J. Wang, P. Wang, M. Sparrow, J. Yang and H. Chen                       | Influences of urbanization on surface characteristics as derived from the Moderate-Resolution Imaging Spectroradiometer: A case study for the Beijing metropolitan area | Journal of Geophysical Research-Atmospheres | MODIS          | local-scale SUHI variations  | Local       | Day and night | All seasons    |
| 72  | 2007 | R.-b. Xiao, Z.-y. Ouyang, H. Zheng, W.-f. Li, E. W. Schienke and X.-k. Wang      | Spatial pattern of impervious surfaces and their impacts on land surface temperature in Beijing, China                                                                  | Journal of Environmental Sciences           | Landsat series | local-scale SUHI variations  | Local       | Daytime       | Spring, Summer |
| 73  | 2007 | F. Yuan and M. E. Bauer                                                          | Comparison of impervious surface area and normalized difference vegetation index as indicators of surface urban heat island effects in Landsat imagery                  | Remote Sensing of Environment               | Landsat series | local-scale SUHI variations  | Local       | Daytime       | All seasons    |
| 74  | 2007 | W. Yue, J. Xu, W. Tan and L. Xu                                                  | The relationship between land surface temperature and NDVI with remote sensing: application to Shanghai Landsat 7 ETM+ data                                             | International Journal of Remote Sensing     | Landsat series | local-scale SUHI variations  | Local       | Daytime       | Summer         |
| 75  | 2007 | J. Zhang, Y. Wang and Z. Wang                                                    | Change analysis of land surface temperature based on robust statistics in the estuarine area of Pearl River (China) from 1990 to 2000 by Landsat TM/ETM+ data           | International Journal of Remote Sensing     | Landsat series | SUHI variations among cities | Regional    | Daytime       | Autumn         |

| No. | Year | Authors                                                         | Title                                                                                                                                                                    | Journal                                                                          | Sensor         | Research foci               | Study scale | Time-of-day   | Study Season |
|-----|------|-----------------------------------------------------------------|--------------------------------------------------------------------------------------------------------------------------------------------------------------------------|----------------------------------------------------------------------------------|----------------|-----------------------------|-------------|---------------|--------------|
| 76  | 2008 | Y. B. Katpatal, A. Kute and D. R. Satapathy                     | Surface- and air-temperature studies in relation to land use/land cover of Nagpur urban area using landsat 5 TM data                                                     | Journal of Urban Planning and Development-Asce                                   | Landsat series | surface-air UHIs            | Local       | Daytime       | Winter       |
| 77  | 2008 | K. Li and Z. Yu                                                 | Comparative and Combinative Study of Urban Heat island in Wuhan City with Remote Sensing and CFD Simulation                                                              | Sensors                                                                          | Landsat series | local-scale SUHI variations | Local       | Daytime       | Summer       |
| 78  | 2008 | B. Liang and Q. Weng                                            | Multiscale analysis of census-based land surface temperature variations and determinants in Indianapolis, United States                                                  | Journal of Urban Planning and Development                                        | Landsat series | local-scale SUHI variations | Local       | Daytime       | Summer       |
| 79  | 2008 | H. Liu and Q. Weng                                              | Seasonal variations in the relationship between landscape pattern and land surface temperature in Indianapolis, USA                                                      | Environmental Monitoring and Assessment                                          | ASTER          | local-scale SUHI variations | Local       | Daytime       | All seasons  |
| 80  | 2008 | J. E. Nichol and M. S. Wong                                     | Spatial variability of air temperature and appropriate resolution for satellite-derived air temperature estimation                                                       | International Journal of Remote Sensing                                          | ASTER          | surface-air UHIs            | Local       | Nighttime     | Winter       |
| 81  | 2008 | M. A. Pena                                                      | Relationships between remotely sensed surface parameters associated with the urban heat sink formation in Santiago, Chile                                                | International Journal of Remote Sensing                                          | Landsat series | local-scale SUHI variations |             | Daytime       | Summer       |
| 82  | 2008 | M. Tiangco, A. M. F. Lagmay and J. Argete                       | ASTER-based study of the night-time urban heat island effect in Metro Manila                                                                                             | International Journal of Remote Sensing                                          | ASTER          | local-scale SUHI variations | Local       | Nighttime     | Spring       |
| 83  | 2008 | Q. Weng, H. Liu, B. Liang and D. Lu                             | The Spatial Variations of Urban Land Surface Temperatures: Pertinent Factors, Zoning Effect, and Seasonal Variability                                                    | Ieee Journal of Selected Topics in Applied Earth Observations and Remote Sensing | ASTER          | local-scale SUHI variations | Local       | Not available | All seasons  |
| 84  | 2008 | Q. Weng and D. Lu                                               | A sub-pixel analysis of urbanization effect on land surface temperature and its interplay with impervious surface and vegetation coverage in Indianapolis, United States | International Journal of Applied Earth Observation and Geoinformation            | Landsat series | local-scale SUHI variations | Local       | Daytime       | Summer       |
| 85  | 2008 | R. Xiao, Q. Weng, Z. Ouyang, W. Li, E. W. Schienke and Z. Zhang | Land surface temperature variation and major factors in Beijing, China                                                                                                   | Photogrammetric Engineering and Remote Sensing                                   | Landsat series | local-scale SUHI variations | Local       | Daytime       | Summer       |

| No. | Year | Authors                                                       | Title                                                                                                                                               | Journal                                                            | Sensor         | Research foci                | Study scale | Time-of-day   | Study Season   |
|-----|------|---------------------------------------------------------------|-----------------------------------------------------------------------------------------------------------------------------------------------------|--------------------------------------------------------------------|----------------|------------------------------|-------------|---------------|----------------|
| 86  | 2008 | J. Zhang and Y. Wang                                          | Study of the Relationships between the Spatial Extent of Surface Urban Heat Islands and Urban Characteristic Factors Based on Landsat ETM plus Data | Sensors                                                            | Landsat series | SUHI variations among cities | Regional    | Daytime       | Winter         |
| 87  | 2009 | R. Amiri, Q. Weng, A. Alimohammadi and S. K. Alavipanah       | Spatial-temporal dynamics of land surface temperature in relation to fractional vegetation cover and land use/cover in the Tabriz urban area, Iran  | Remote Sensing of Environment                                      | Landsat series | local-scale SUHI variations  | Local       | Daytime       | Summer         |
| 88  | 2009 | K. J. Bhang and S.-S. Park                                    | Evaluation of the Surface Temperature Variation With Surface Settings on the Urban Heat Island in Seoul, Korea, Using Landsat-7 ETM+ and SPOT       | Ieee Geoscience and Remote Sensing Letters                         | Landsat series | local-scale SUHI variations  | Local       | Day and night | Autumn         |
| 89  | 2009 | S. Cheval and A. Dumitrescu                                   | The July urban heat island of Bucharest as derived from modis images                                                                                | Theoretical and Applied Climatology                                | MODIS          | local-scale SUHI variations  | Local       | Day and night | All seasons    |
| 90  | 2009 | S. Cheval, A. Dumitrescu and A. Bell                          | The urban heat island of Bucharest during the extreme high temperatures of July 2007                                                                | Theoretical and Applied Climatology                                | MODIS          | surface-air UHIs             | Local       | Day and night | Summer         |
| 91  | 2009 | T. Chiu, P. Wong, S. Lam, A. Burd and J. Nichol               | Urban Temperatures in Hong Kong: Thermal Environmental Safety and Implications for City Planning                                                    | Journal of Burn Care & Research                                    | ASTER          | local-scale SUHI variations  | Local       | Daytime       | Autumn         |
| 92  | 2009 | W. Y. Fung, K. S. Lam, J. Nichol and M. S. Wong               | Derivation of Nighttime Urban Air Temperatures Using a Satellite Thermal Image                                                                      | Journal of Applied Meteorology and Climatology                     | ASTER          | surface-air UHIs             | Local       | Nighttime     | Winter         |
| 93  | 2009 | J. Huang, R. Wang, F. Li, W. Yang, C. Zhou, J. Jin and Y. Shi | Simulation of thermal effects due to different amounts of urban vegetation within the built-up area of Beijing, China                               | International Journal of Sustainable Development and World Ecology | Landsat series | Others                       | Local       | Nighttime     | Summer, Autumn |
| 94  | 2009 | Y. Kant, B. D. Bharath, J. Mallick, C. Atzberger and N. Kerle | Satellite-based Analysis of the Role of Land Use/Land Cover and Vegetation Density on Surface Temperature Regime of Delhi, India                    | Journal of the Indian Society of Remote Sensing                    | ASTER          | local-scale SUHI variations  | Local       | Day and night | Autumn         |
| 95  | 2009 | J.-j. Li, X.-r. Wang, X.-j. Wang, W.-c. Ma and H. Zhang       | Remote sensing evaluation of urban heat island and its spatial pattern of the Shanghai metropolitan area, China                                     | Ecological Complexity                                              | Landsat series | local-scale SUHI variations  | Local       | Daytime       | Spring, Summer |

| No. | Year | Authors                                                                                                                                           | Title                                                                                                                                          | Journal                                            | Sensor         | Research foci               | Study scale | Time-of-day   | Study Season           |
|-----|------|---------------------------------------------------------------------------------------------------------------------------------------------------|------------------------------------------------------------------------------------------------------------------------------------------------|----------------------------------------------------|----------------|-----------------------------|-------------|---------------|------------------------|
| 96  | 2009 | H. Liu and Q. Weng                                                                                                                                | Scaling Effect on the Relationship between Landscape Pattern and Land Surface Temperature: A Case Study of Indianapolis, United States         | Photogrammetric Engineering and Remote Sensing     | ASTER          | local-scale SUHI variations | Local       | Daytime       | All seasons            |
| 97  | 2009 | D. Meng, X. Li, W. Zhao and H. Gong                                                                                                               | Quantitative exploration of the mechanisms behind the urban thermal environment in Beijing                                                     | Progress in Natural Science                        | Landsat series | local-scale SUHI variations | Local       | Daytime       | Autumn                 |
| 98  | 2009 | S. Miao, F. Chen, M. A. Lemone, M. Tewari, Q. Li and Y. Wang                                                                                      | An Observational and Modeling Study of Characteristics of Urban Heat Island and Boundary Layer Structures in Beijing                           | Journal of Applied Meteorology and Climatology     | MODIS          | Others                      |             | Day and night | Summer                 |
| 99  | 2009 | J. Nichol                                                                                                                                         | An Emissivity Modulation Method for Spatial Enhancement of Thermal Satellite Images in Urban Heat Island Analysis                              | Photogrammetric Engineering and Remote Sensing     | ASTER          | Others                      | Local       | Nighttime     | Winter                 |
| 100 | 2009 | J. E. Nichol, W. Y. Fung, K.-s. Lam and M. S. Wong                                                                                                | Urban heat island diagnosis using ASTER satellite images and 'in situ' air temperature                                                         | Atmospheric Research                               | ASTER          | surface-air UHIs            | Local       | Nighttime     | Winter                 |
| 101 | 2009 | U. Rajasekar and Q. Weng                                                                                                                          | Application of Association Rule Mining for Exploring the Relationship between Urban Land Surface Temperature and Biophysical/Social Parameters | Photogrammetric Engineering and Remote Sensing     | ASTER          | local-scale SUHI variations | Local       | Daytime       | Spring, Summer, Autumn |
| 102 | 2009 | U. Rajasekar and Q. Weng                                                                                                                          | Spatio-temporal modelling and analysis of urban heat islands by using Landsat TM and ETM plus imagery                                          | International Journal of Remote Sensing            | Landsat series | local-scale SUHI variations | Local       | Daytime       | Summer                 |
| 103 | 2009 | U. Rajasekar and Q. Weng                                                                                                                          | Urban heat island monitoring and analysis using a non-parametric model: A case study of Indianapolis                                           | Isprs Journal of Photogrammetry and Remote Sensing | MODIS          | Others                      | Local       | Day and night | All seasons            |
| 104 | 2009 | C. Rosenzweig, W. D. Solecki, L. Parshall, B. Lynn, J. Cox, R. Goldberg, S. Hodges, S. Gaffin, R. B. Slosberg, P. Savio, F. Dunstan and M. Watson | Mitigating New York City's heat island: Integrating Stakeholder Perspectives and Scientific Evaluation                                         | Bulletin of the American Meteorological Society    | MODIS          | Others                      | Local       | Day and night | Autumn                 |

| No. | Year | Authors                                                                            | Title                                                                                                                                              | Journal                                                                          | Sensor                | Research foci               | Study scale | Time-of-day   | Study Season     |
|-----|------|------------------------------------------------------------------------------------|----------------------------------------------------------------------------------------------------------------------------------------------------|----------------------------------------------------------------------------------|-----------------------|-----------------------------|-------------|---------------|------------------|
| 105 | 2009 | A. Smargiassi, M. S. Goldberg, C. Plante, M. Fournier, Y. Baudouin and T. Kosatsky | Variation of daily warm season mortality as a function of micro-urban heat islands                                                                 | Journal of Epidemiology and Community Health                                     | Landsat series        | Others                      | Local       | Daytime       | Summer           |
| 106 | 2009 | M. Stathopoulou and C. Cartalis                                                    | Downscaling AVHRR land surface temperatures for improved surface urban heat island intensity estimation                                            | Remote Sensing of Environment                                                    | Landsat series, AHVRR | Others                      | Local       | Daytime       | Summer           |
| 107 | 2009 | H. Xu, F. Ding and X. Wen                                                          | Urban Expansion and Heat Island Dynamics in the Quanzhou Region, China                                                                             | Ieee Journal of Selected Topics in Applied Earth Observations and Remote Sensing | Landsat series        | local-scale SUHI variations | Local       | Daytime       | Spring, Autumn   |
| 108 | 2009 | S. Xu                                                                              | An approach to analyzing the intensity of the daytime surface urban heat island effect at a local scale                                            | Environmental Monitoring and Assessment                                          | Landsat series        | local-scale SUHI variations | Local       | Daytime       | Summer           |
| 109 | 2009 | X. Zhang, T. Zhong, X. Feng and K. Wang                                            | Estimation of the relationship between vegetation patches and urban land surface temperature with remote sensing                                   | International Journal of Remote Sensing                                          | Landsat series        | local-scale SUHI variations | Local       | Daytime       | Summer           |
| 110 | 2009 | X. Zhang, T. Zhong, K. Wang and Z. Cheng                                           | Scaling of impervious surface area and vegetation as indicators to urban land surface temperature using satellite data                             | International Journal of Remote Sensing                                          | Landsat series        | local-scale SUHI variations | Local       | Daytime       | Summer           |
| 111 | 2009 | Y. Zhang, I. O. A. Odeh and C. Han                                                 | Bi-temporal characterization of land surface temperature in relation to impervious surface area, NDVI and NDBI, using a sub-pixel image analysis   | International Journal of Applied Earth Observation and Geoinformation            | Landsat series        | local-scale SUHI variations | Local       | Daytime       | Spring, Summer   |
| 112 | 2010 | A. Buyantuyev and J. Wu                                                            | Urban heat islands and landscape heterogeneity: linking spatiotemporal variations in surface temperatures to land-cover and socioeconomic patterns | Landscape Ecology                                                                | ASTER                 | local-scale SUHI variations | Local       | Day and night | Summer, Autumn   |
| 113 | 2010 | T.-Y. Chang, Y.-A. Liou, C.-Y. Lin, S.-C. Liu and Y.-C. Wang                       | Evaluation of surface heat fluxes in Chiayi plain of Taiwan by remotely sensed data                                                                | International Journal of Remote Sensing                                          | MODIS                 | Others                      | Local       | Day and night | All seasons      |
| 114 | 2010 | X. Dai, Z. Guo, L. Zhang and D. Li                                                 | Spatio-temporal exploratory analysis of urban surface temperature field in Shanghai,                                                               | Environmental Research                                                           | Landsat series        | local-scale SUHI variations | Local       | Daytime       | Spring, Summer , |

| No. | Year | Authors                                            | Title                                                                                                                                                                       | Journal                                                               | Sensor                | Research foci                | Study scale | Time-of-day   | Study Season   |
|-----|------|----------------------------------------------------|-----------------------------------------------------------------------------------------------------------------------------------------------------------------------------|-----------------------------------------------------------------------|-----------------------|------------------------------|-------------|---------------|----------------|
|     |      |                                                    | China                                                                                                                                                                       | and Risk Assessment                                                   |                       |                              |             |               | Autumn         |
| 115 | 2010 | R. Fabrizi, S. Bonafoni and R. Biondi              | Satellite and Ground-Based Sensors for the Urban Heat Island Analysis in the City of Rome                                                                                   | Remote Sensing                                                        | 6                     | surface-air UHIs             | Local       | Day and night |                |
| 116 | 2010 | Y. Hu and G. Jia                                   | Influence of land use change on urban heat island derived from multi-sensor data                                                                                            | International Journal of Climatology                                  | Landsat series        | local-scale SUHI variations  | Local       | Daytime       | Autumn         |
| 117 | 2010 | M. L. Imhoff, P. Zhang, R. E. Wolfe and L. Bounoua | Remote sensing of the urban heat island effect across biomes in the continental USA                                                                                         | Remote Sensing of Environment                                         | MODIS                 | SUHI variations among cities | Regional    | Day and night | All seasons    |
| 118 | 2010 | S. Li, Z. Zhao, M. Xie and Y. Wang                 | Investigating spatial non-stationary and scale-dependent relationships between urban surface temperature and environmental factors using geographically weighted regression | Environmental Modelling & Software                                    | Landsat series        | Others                       | Local       | Daytime       | Autumn         |
| 119 | 2010 | Y. Ma, Y. Kuang and N. Huang                       | Coupling urbanization analyses for studying urban thermal environment and its interplay with biophysical parameters based on TM/ETM plus imagery                            | International Journal of Applied Earth Observation and Geoinformation | Landsat series        | local-scale SUHI variations  | Local       | Daytime       | Autumn         |
| 120 | 2010 | W. Su, C. Gu and G. Yang                           | Assessing the Impact of Land Use/Land Cover on Urban Heat Island Pattern in Nanjing City, China                                                                             | Journal of Urban Planning and Development                             | Landsat series        | local-scale SUHI variations  | Local       | Daytime       | Spring         |
| 121 | 2010 | H. Xie, N.-B. Chang, A. Daranpob and D. Prado      | Assessing the long-term urban heat island in San Antonio, Texas based on moderate resolution imaging spectroradiometer/Aqua Data                                            | Journal of Applied Remote Sensing                                     | MODIS                 | local-scale SUHI variations  | Local       | Day and night | Summer         |
| 122 | 2010 | H. Xu                                              | Analysis of Impervious Surface and its Impact on Urban Heat Environment using the Normalized Difference Impervious Surface Index (NDISI)                                    | Photogrammetric Engineering and Remote Sensing                        | Landsat series, ASTER | local-scale SUHI variations  | Local       | Daytime       | Spring, Autumn |
| 123 | 2010 | Y. Xu, Z. Qin and H. Wan                           | Spatial and Temporal Dynamics of Urban Heat Island and Their Relationship with Land Cover Changes in Urbanization Process: A Case Study in Suzhou, China                    | Journal of the Indian Society of Remote Sensing                       | Landsat series        | local-scale SUHI variations  | Local       | Daytime       | Summer         |

| No. | Year | Authors                                                                                                                                | Title                                                                                                                                      | Journal                                                            | Sensor                | Research foci                | Study scale | Time-of-day   | Study Season |
|-----|------|----------------------------------------------------------------------------------------------------------------------------------------|--------------------------------------------------------------------------------------------------------------------------------------------|--------------------------------------------------------------------|-----------------------|------------------------------|-------------|---------------|--------------|
| 124 | 2010 | J. Yang, P. Gong, J. Zhou, H. Huang and L. Wang                                                                                        | Detection of the urban heat island in Beijing using HJ-1B satellite imagery                                                                | Science China-Earth Sciences                                       | HJ-Landsat seriesB    | Others                       | Local       | Daytime       | Autumn       |
| 125 | 2010 | P. Zhang, M. L. Imhoff, R. E. Wolfe and L. Bounoua                                                                                     | Characterizing urban heat islands of global settlements using MODIS and nighttime lights products                                          | Canadian Journal of Remote Sensing                                 | MODIS                 | SUHI variations among cities | Global      | Day and night | All seasons  |
| 126 | 2010 | X. Zhao, J. Huang, H. Ye, K. Wang and Q. Qiu                                                                                           | Spatiotemporal changes of the urban heat island of a coastal city in the context of urbanisation                                           | International Journal of Sustainable Development and World Ecology | Landsat series        | local-scale SUHI variations  | Local       | Daytime       | Winter       |
| 127 | 2010 | J. Zhou, J. Li and J. Yue                                                                                                              | Analysis of urban heat island (UHI) in the Beijing metropolitan area by time-series MODIS data                                             | 2010 IEEE International Geoscience and Remote Sensing Symposium    | MODIS                 | local-scale SUHI variations  | Local       | Day and night | All seasons  |
| 128 | 2011 | I. J. Apolonio Callejas, A. S. de Oliveira, F. M. de Moura Santos, L. C. Durante, M. C. de Jesus Albuquerque Nogueira and P. Zeilhofer | Relationship between land use/cover and surface temperatures in the urban agglomeration of Cuiaba-Varzea Grande, Central Brazil            | Journal of Applied Remote Sensing                                  | Landsat series        | local-scale SUHI variations  | Local       | Daytime       | Spring       |
| 129 | 2011 | G. Cai, M. Du and Y. Xue                                                                                                               | Monitoring of urban heat island effect in Beijing combining ASTER and TM data                                                              | International Journal of Remote Sensing                            | Landsat series, ASTER | local-scale SUHI variations  | Local       | Daytime       | All seasons  |
| 130 | 2011 | B. Dousset, F. Gourmelon, K. Laaidi, A. Zeghnoun, E. Giraudet, P. Bretin, E. Mauri and S. Vandentorren                                 | Satellite monitoring of summer heat waves in the Paris metropolitan area                                                                   | International Journal of Climatology                               | AHVR                  | Others                       | Local       | Day and night | Summer       |
| 131 | 2011 | J.-H. Eum, D. Scherer, U. Fehrenbach and J.-H. Woo                                                                                     | Development of an urban landcover classification scheme suitable for representing climatic conditions in a densely built-up Asian megacity | Landscape and Urban Planning                                       | Landsat series        | Others                       | Local       | Daytime       | Autumn       |
| 132 | 2011 | T. Houet and G. Pigeon                                                                                                                 | Mapping urban climate zones and quantifying climate behaviors - An application on Toulouse urban area (France)                             | Environmental Pollution                                            | ASTER                 | Others                       | Local       | Daytime       | Summer       |

| No. | Year | Authors                                                                  | Title                                                                                                                                                 | Journal                                                                                     | Sensor                | Research foci                | Study scale | Time-of-day   | Study Season   |
|-----|------|--------------------------------------------------------------------------|-------------------------------------------------------------------------------------------------------------------------------------------------------|---------------------------------------------------------------------------------------------|-----------------------|------------------------------|-------------|---------------|----------------|
| 133 | 2011 | G. Huang, W. Zhou and M. L. Cadenasso                                    | Is everyone hot in the city? Spatial pattern of land surface temperatures, land cover and neighborhood socioeconomic characteristics in Baltimore, MD | Journal of Environmental Management                                                         | Landsat series        | local-scale SUHI variations  | Local       | Daytime       | Summer         |
| 134 | 2011 | M. S. Jin, W. Kessomkiat and G. Pereira                                  | Satellite-Observed Urbanization Characters in Shanghai, China: Aerosols, Urban Heat Island Effect, and Land-Atmosphere Interactions                   | Remote Sensing                                                                              | MODIS                 | Others                       | Local       | Daytime       | All seasons    |
| 135 | 2011 | I. Keramitsoglou, C. T. Kiranoudis, G. Ceriola, Q. Weng and U. Rajasekar | Identification and analysis of urban surface temperature patterns in Greater Athens, Greece, using MODIS imagery                                      | Remote Sensing of Environment                                                               | MODIS                 | local-scale SUHI variations  | Local       | Day and night | All seasons    |
| 136 | 2011 | L. Lee, L. Chen, X. Wang and J. Zhao                                     | Use of Landsat TM/ETM+ data to analyze urban heat island and its relationship with land use/cover change                                              | 2011 International Conference on Remote Sensing, Environment and Transportation Engineering | Landsat series        | local-scale SUHI variations  | Local       | Daytime       | Summer ,Autumn |
| 137 | 2011 | J. Li, C. Song, L. Cao, F. Zhu, X. Meng and J. Wu                        | Impacts of landscape structure on surface urban heat islands: A case study of Shanghai, China                                                         | Remote Sensing of Environment                                                               | Landsat series        | local-scale SUHI variations  | Local       | Daytime       | Spring, Summer |
| 138 | 2011 | B. Liang and Q. Weng                                                     | Assessing Urban Environmental Quality Change of Indianapolis, United States, by the Remote Sensing and GIS Integration                                | Ieee Journal of Selected Topics in Applied Earth Observations and Remote Sensing            | Landsat series        | Others                       | Local       | Daytime       | Summer         |
| 139 | 2011 | L. Liu and Y. Zhang                                                      | Urban Heat Island Analysis Using the Landsat TM Data and ASTER Data: A Case Study in Hong Kong                                                        | Remote Sensing                                                                              | Landsat series, ASTER | local-scale SUHI variations  | Local       | Nighttime     | Winter         |
| 140 | 2011 | C. Rinner and M. Hussain                                                 | Toronto's Urban Heat Island-Exploring the Relationship between Land Use and Surface Temperature                                                       | Remote Sensing                                                                              | Landsat series        | local-scale SUHI variations  | Local       | Daytime       | Autumn         |
| 141 | 2011 | N. Schwarz, S. Lautenbach and R. Seppelt                                 | Exploring indicators for quantifying surface urban heat islands of European cities with MODIS land surface temperatures                               | Remote Sensing of Environment                                                               | MODIS                 | SUHI variations among cities | Regional    | Day and night | Summer, Winter |



| No. | Year | Authors                                                    | Title                                                                                                                                  | Journal                                                                          | Sensor                | Research foci               | Study scale | Time-of-day   | Study Season   |
|-----|------|------------------------------------------------------------|----------------------------------------------------------------------------------------------------------------------------------------|----------------------------------------------------------------------------------|-----------------------|-----------------------------|-------------|---------------|----------------|
| 142 | 2011 | C. J. Tomlinson, L. Chapman, J. E. Thornes and C. J. Baker | Including the urban heat island in spatial heat health risk assessment strategies: a case study for Birmingham, UK                     | International journal of health geographics                                      | MODIS                 | Others                      | Local       | Nighttime     | Summer         |
| 143 | 2011 | X. Wen, X. Yang and G. Hu                                  | Relationship Between Land Cover Ratio and Urban Heat Island from Remote Sensing and Automatic Weather Stations Data                    | Journal of the Indian Society of Remote Sensing                                  | Landsat series        | local-scale SUHI variations | Local       | Daytime       | Summer, Autumn |
| 144 | 2011 | Q. Weng, U. Rajasekar and X. Hu                            | Modeling Urban Heat Islands and Their Relationship With Impervious Surface and Vegetation Abundance by Using ASTER Images              | Ieee Transactions on Geoscience and Remote Sensing                               | ASTER                 | local-scale SUHI variations | Local       | Daytime       | All seasons    |
| 145 | 2011 | J. Zhou, Y. Chen, J. Wang and W. Zhan                      | Maximum Nighttime Urban Heat Island (UHI) Intensity Simulation by Integrating Remotely Sensed Data and Meteorological Observations     | Ieee Journal of Selected Topics in Applied Earth Observations and Remote Sensing | MODIS                 | surface-air UHIs            | Local       | Nighttime     | Summer, Winter |
| 146 | 2011 | W. Zhou, G. Huang and M. L. Cadenasso                      | Does spatial configuration matter? Understanding the effects of land cover pattern on land surface temperature in urban landscapes     | Landscape and Urban Planning                                                     | Landsat series        | local-scale SUHI variations | Local       | Daytime       | Summer         |
| 147 | 2012 | Z. Chen, C. Gong, J. Wu and S. Yu                          | The influence of socioeconomic and topographic factors on nocturnal urban heat islands: a case study in Shenzhen, China                | International Journal of Remote Sensing                                          | Landsat series, ASTER | local-scale SUHI variations | Local       | Day and night | Autumn         |
| 148 | 2012 | Y. Y. Cui and B. de Foy                                    | Seasonal Variations of the Urban Heat Island at the Surface and the Near-Surface and Reductions due to Urban Vegetation in Mexico City | Journal of Applied Meteorology and Climatology                                   | MODIS                 | surface-air UHIs            | Local       | Day and night | All seasons    |
| 149 | 2012 | M. S. Jin                                                  | Developing an Index to Measure Urban Heat Island Effect Using Satellite Land Skin Temperature and Land Cover Observations              | Journal of Climate                                                               | MODIS                 | Others                      | Local       | Day and night | All seasons    |
| 150 | 2012 | S. Kaya, U. G. Basar, M. Karaca and D. Z. Seker            | Assessment of Urban Heat Islands Using Remotely Sensed Data                                                                            | Ekoloji                                                                          | Landsat series        | local-scale SUHI variations | Local       | Daytime       | Summer, Autumn |

| No. | Year | Authors                                                                                                                                   | Title                                                                                                                                | Journal                                                               | Sensor                               | Research foci                | Study scale | Time-of-day   | Study Season           |
|-----|------|-------------------------------------------------------------------------------------------------------------------------------------------|--------------------------------------------------------------------------------------------------------------------------------------|-----------------------------------------------------------------------|--------------------------------------|------------------------------|-------------|---------------|------------------------|
| 151 | 2012 | I. Keramitsoglou, I. A. Daglis, V. Amiridis, N. Chrysoulakis, G. Ceriola, P. Manunta, B. Maiheu, K. De Ridder, D. Lauwaet and M. Paganini | Evaluation of satellite-derived products for the characterization of the urban thermal environment                                   | Journal of Applied Remote Sensing                                     | Landsat series,AHVRR,MODIS,ASTER,6,8 | SUHI variations among cities | Regional    | Day and night |                        |
| 152 | 2012 | L. Klok, S. Zwart, H. Verhagen and E. Mauri                                                                                               | The surface heat island of Rotterdam and its relationship with urban surface characteristics                                         | Resources Conservation and Recycling                                  | Landsat series, AHVRR                | local-scale SUHI variations  | Local       | Daytime       | Summer                 |
| 153 | 2012 | X. Li, W. Zhou, Z. Ouyang, W. Xu and H. Zheng                                                                                             | Spatial pattern of greenspace affects land surface temperature: evidence from the heavily urbanized Beijing metropolitan area, China | Landscape Ecology                                                     | Landsat series                       | local-scale SUHI variations  | Local       | Daytime       | Autumn                 |
| 154 | 2012 | Y.-y. Li, H. Zhang and W. Kainz                                                                                                           | Monitoring patterns of urban heat islands of the fast-growing Shanghai metropolis, China: Using time-series of Landsat TM/ETM+ data  | International Journal of Applied Earth Observation and Geoinformation | Landsat series                       | local-scale SUHI variations  | Local       | Daytime       | Spring, Summer, Autumn |
| 155 | 2012 | Y. Liu, G. Shintaro, D. Zhuang and W. Kuang                                                                                               | Urban surface heat fluxes infrared remote sensing inversion and their relationship with land use types                               | Journal of Geographical Sciences                                      | ASTER                                | local-scale SUHI variations  | Local       | Daytime       | Summer                 |
| 156 | 2012 | C. W. Mackey, X. Lee and R. B. Smith                                                                                                      | Remotely sensing the cooling effects of city scale efforts to reduce urban heat island                                               | Building and Environment                                              | Landsat series                       | Others                       | Local       | Daytime       | Summer                 |
| 157 | 2012 | J. Mallick and A. Rahman                                                                                                                  | Impact of population density on the surface temperature and micro-climate of Delhi                                                   | Current Science                                                       | ASTER                                | local-scale SUHI variations  | Local       | Nighttime     | Autumn                 |
| 158 | 2012 | J. E. Nichol and T. P. Hang                                                                                                               | Temporal characteristics of thermal satellite images for urban heat stress and heat island mapping                                   | Isprs Journal of Photogrammetry and Remote Sensing                    | ASTER                                | surface-air UHIs             | Local       | Day and night | Summer                 |
| 159 | 2012 | I. Ogashawara and V. d. S. Brum Bastos                                                                                                    | A Quantitative Approach for Analyzing the Relationship between Urban Heat Islands and Land Cover                                     | Remote Sensing                                                        | Landsat series                       | local-scale SUHI variations  | Local       | Daytime       | Spring                 |
| 160 | 2012 | P. Pandey, D. Kumar, A. Prakash, J. Masih, M. Singh, S. Kumar, V. K.                                                                      | A study of urban heat island and its association with particulate matter during winter months over Delhi                             | Science of the Total Environment                                      | MODIS                                | Others                       | Local       | Day and night | Winter                 |

| No. | Year | Authors                                                                                                | Title                                                                                                                                                               | Journal                                                           | Sensor                | Research foci                | Study scale | Time-of-day   | Study Season           |
|-----|------|--------------------------------------------------------------------------------------------------------|---------------------------------------------------------------------------------------------------------------------------------------------------------------------|-------------------------------------------------------------------|-----------------------|------------------------------|-------------|---------------|------------------------|
|     |      | Jain and K. Kumar                                                                                      |                                                                                                                                                                     |                                                                   |                       |                              |             |               |                        |
| 161 | 2012 | S. Peng, S. Piao, P. Ciais, P. Friedlingstein, C. Ottle, F.-M. Breon, H. Nan, L. Zhou and R. B. Myneni | Surface Urban Heat Island Across 419 Global Big Cities                                                                                                              | Environmental Science & Technology                                | MODIS                 | SUHI variations among cities | Global      | Day and night | All seasons            |
| 162 | 2012 | M. Pichierri, S. Bonafoni and R. Biondi                                                                | Satellite air temperature estimation for monitoring the canopy layer heat island of Milan                                                                           | Remote Sensing of Environment                                     | MODIS                 | surface-air UHIs             | Local       | Day and night | Summer                 |
| 163 | 2012 | W. Su, G. Yang, S. Chen and Y. Yang                                                                    | Measuring the Pattern of High Temperature Areas in Urban Greenery of Nanjing City, China                                                                            | International Journal of Environmental Research and Public Health | Landsat series        | local-scale SUHI variations  | Local       | Daytime       | Summer                 |
| 164 | 2012 | Y.-F. Su, G. M. Foody and K.-S. Cheng                                                                  | Spatial non-stationarity in the relationships between land cover and surface temperature in an urban heat island and its impacts on thermally sensitive populations | Landscape and Urban Planning                                      | AHVR                  | local-scale SUHI variations  | Local       | Daytime       | Spring                 |
| 165 | 2012 | Q. Sun, Z. Wu and J. Tan                                                                               | The relationship between land surface temperature and land use/land cover in Guangzhou, China                                                                       | Environmental Earth Sciences                                      | Landsat series        | local-scale SUHI variations  | Local       | Daytime       | Autumn                 |
| 166 | 2012 | R. Sun and L. Chen                                                                                     | How can urban water bodies be designed for climate adaptation?                                                                                                      | Landscape and Urban Planning                                      | ASTER                 | local-scale SUHI variations  | Local       | Daytime       | Summer                 |
| 167 | 2012 | C. J. Tomlinson, L. Chapman, J. E. Thornes and C. J. Baker                                             | Derivation of Birmingham's summer surface urban heat island from MODIS satellite images                                                                             | International Journal of Climatology                              | MODIS                 | local-scale SUHI variations  | Local       | Nighttime     | Summer                 |
| 168 | 2012 | E. A. Wentz, D. A. Quattrochi, M. Netzband and S. W. Myint                                             | Synthesizing urban remote sensing through application, scale, data and case studies                                                                                 | Geocarto International                                            | Landsat series, ASTER | local-scale SUHI variations  | Local       | Daytime       | Spring                 |
| 169 | 2012 | K. V. Wong and S. Chaudhry                                                                             | Use of Satellite Images for Observational and Quantitative Analysis of Urban Heat Islands Around the World                                                          | Journal of Energy Resources Technology-Transactions of the ASME   | Landsat series        | SUHI variations among cities | Global      | Daytime       | Summer, Autumn, Winter |

| No. | Year | Authors                                                                                                  | Title                                                                                                                                                                | Journal                                               | Sensor         | Research foci                | Study scale | Time-of-day   | Study Season           |
|-----|------|----------------------------------------------------------------------------------------------------------|----------------------------------------------------------------------------------------------------------------------------------------------------------------------|-------------------------------------------------------|----------------|------------------------------|-------------|---------------|------------------------|
| 170 | 2012 | Y. Xiong, S. Huang, F. Chen, H. Ye, C. Wang and C. Zhu                                                   | The Impacts of Rapid Urbanization on the Thermal Environment: A Remote Sensing Study of Guangzhou, South China                                                       | Remote Sensing                                        | Landsat series | local-scale SUHI variations  | Local       | Daytime       | Spring, Winter         |
| 171 | 2012 | W. Yue, Y. Liu, P. Fan, X. Ye and C. Wu                                                                  | Assessing spatial pattern of urban thermal environment in Shanghai, China                                                                                            | Stochastic Environmental Research and Risk Assessment | Landsat series | local-scale SUHI variations  | Local       | Daytime       | Spring                 |
| 172 | 2012 | K. Zaksek and K. Ostir                                                                                   | Downscaling land surface temperature for urban heat island diurnal cycle analysis                                                                                    | Remote Sensing of Environment                         | 8              | SUHI variations among cities | Regional    | Day and night | All seasons            |
| 173 | 2012 | P. Zhang, M. L. Imhoff, L. Bounoua and R. E. Wolfe                                                       | Exploring the influence of impervious surface density and shape on urban heat islands in the northeast United States using MODIS and Landsat                         | Canadian Journal of Remote Sensing                    | MODIS          | SUHI variations among cities | Regional    | Day and night | All seasons            |
| 174 | 2013 | B. Ahmed, M. Kamruzzaman, X. Zhu, M. S. Rahman and K. Choi                                               | Simulating Land Cover Changes and Their Impacts on Land Surface Temperature in Dhaka, Bangladesh                                                                     | Remote Sensing                                        | Landsat series | local-scale SUHI variations  | Local       | Daytime       | Autumn, Winter         |
| 175 | 2013 | N. Clinton and P. Gong                                                                                   | MODIS detected surface urban heat islands and sinks: Global locations and controls                                                                                   | Remote Sensing of Environment                         | MODIS          | SUHI variations among cities | Global      | Day and night | All seasons            |
| 176 | 2013 | J. P. Connors, C. S. Galletti and W. T. L. Chow                                                          | Landscape configuration and urban heat island effects: assessing the relationship between landscape characteristics and land surface temperature in Phoenix, Arizona | Landscape Ecology                                     | ASTER          | local-scale SUHI variations  | Local       | Nighttime     | Summer                 |
| 177 | 2013 | A. J. de Lucena, O. C. Rotunno Filho, J. R. de Almeida Franca, L. d. F. Peres and L. N. Rodrigues Xavier | Urban climate and clues of heat island events in the metropolitan area of Rio de Janeiro                                                                             | Theoretical and Applied Climatology                   | Landsat series | local-scale SUHI variations  | Local       | Daytime       | Spring, Summer, Winter |
| 178 | 2013 | C. Deng and C. Wu                                                                                        | Examining the impacts of urban biophysical compositions on surface urban heat island: A spectral unmixing and thermal mixing approach                                | Remote Sensing of Environment                         | Landsat series | local-scale SUHI variations  |             | Daytime       | Summer                 |
| 179 | 2013 | H. Ding and W. Shi                                                                                       | Land-use/land-cover change and its influence on surface temperature: a case                                                                                          | International Journal of Remote Sensing               | Landsat series | local-scale SUHI variations  | Local       | Daytime       | Summer                 |

| No. | Year | Authors                                                 | Title                                                                                                                                                      | Journal                                                                          | Sensor                | Research foci                | Study scale | Time-of-day   | Study Season   |
|-----|------|---------------------------------------------------------|------------------------------------------------------------------------------------------------------------------------------------------------------------|----------------------------------------------------------------------------------|-----------------------|------------------------------|-------------|---------------|----------------|
|     |      |                                                         | study in Beijing City                                                                                                                                      |                                                                                  |                       |                              |             |               |                |
| 180 | 2013 | P. Dobrovolny                                           | The surface urban heat island in the city of Brno (Czech Republic) derived from land surface temperatures and selected reasons for its spatial variability | Theoretical and Applied Climatology                                              | Landsat series        | local-scale SUHI variations  | Local       | Daytime       | Summer         |
| 181 | 2013 | W. Essa, J. van der Kwast, B. Verbeiren and O. Batelaan | Downscaling of thermal images over urban areas using the land surface temperature-impervious percentage relationship                                       | International Journal of Applied Earth Observation and Geoinformation            | Landsat series        | Others                       | Local       | Daytime       | Spring         |
| 182 | 2013 | B. Feizizadeh and T. Blaschke                           | Examining Urban Heat Island Relations to Land Use and Air Pollution: Multiple Endmember Spectral Mixture Analysis for Thermal Remote Sensing               | Ieee Journal of Selected Topics in Applied Earth Observations and Remote Sensing | ASTER                 | local-scale SUHI variations  | Local       | Daytime       | Summer         |
| 183 | 2013 | S. Hamada, T. Tanaka and T. Ohta                        | Impacts of land use and topography on the cooling effect of green areas on surrounding urban areas                                                         | Urban Forestry & Urban Greening                                                  | ASTER                 | local-scale SUHI variations  | Local       | Day and night | Summer, Autumn |
| 184 | 2013 | G. Han and J. Xu                                        | Land Surface Phenology and Land Surface Temperature Changes Along an Urban-Rural Gradient in Yangtze River Delta, China                                    | Environmental Management                                                         | MODIS                 | SUHI variations among cities | Regional    | Daytime       | Summer         |
| 185 | 2013 | T. Holderness, S. Barr, R. Dawson and J. Hall           | An evaluation of thermal Earth observation for characterizing urban heatwave event dynamics using the urban heat island intensity metric                   | International Journal of Remote Sensing                                          | AHVR                  | Others                       | Local       | Daytime       | Summer         |
| 186 | 2013 | L. Hu and N. A. Brunzell                                | The impact of temporal aggregation of land surface temperature data for surface urban heat island (SUHI) monitoring                                        | Remote Sensing of Environment                                                    | MODIS                 | Others                       | Local       | Day and night | All seasons    |
| 187 | 2013 | B. Huang, J. Wang, H. Song, D. Fu and K. Wong           | Generating High Spatiotemporal Resolution Land Surface Temperature for Urban Heat Island Monitoring                                                        | Ieee Geoscience and Remote Sensing Letters                                       | Landsat series, MODIS | Others                       | Local       | Daytime       | All seasons    |
| 188 | 2013 | M. Lazzarini, P. R. Marpu and H. Ghedira                | Temperature-land cover interactions: The inversion of urban heat island phenomenon                                                                         | Remote Sensing of Environment                                                    | Landsat series,       | local-scale SUHI variations  | Local       | Day and night | All seasons    |

| No. | Year | Authors                                                       | Title                                                                                                                                                                                      | Journal                                            | Sensor                | Research foci               | Study scale | Time-of-day   | Study Season           |
|-----|------|---------------------------------------------------------------|--------------------------------------------------------------------------------------------------------------------------------------------------------------------------------------------|----------------------------------------------------|-----------------------|-----------------------------|-------------|---------------|------------------------|
|     |      |                                                               | in desert city areas                                                                                                                                                                       |                                                    | MODIS, ASTER          |                             |             |               |                        |
| 189 | 2013 | C.-F. Li and J.-Y. Yin                                        | A Study on Urban Thermal Field of Shanghai Using Multi-source Remote Sensing Data                                                                                                          | Journal of the Indian Society of Remote Sensing    | Landsat series, MODIS | local-scale SUHI variations | Local       | Daytime       | All seasons            |
| 190 | 2013 | X. Li, W. Zhou and Z. Ouyang                                  | Relationship between land surface temperature and spatial pattern of greenspace: What are the effects of spatial resolution?                                                               | Landscape and Urban Planning                       | Landsat series        | local-scale SUHI variations | Local       | Daytime       | Autumn                 |
| 191 | 2013 | J. Mallick, A. Rahman and C. K. Singh                         | Modeling urban heat islands in heterogeneous land surface and its correlation with impervious surface area by using night-time ASTER satellite data in highly urbanizing city, Delhi-India | Advances in Space Research                         | ASTER                 | local-scale SUHI variations | Local       | Nighttime     | Autumn                 |
| 192 | 2013 | F. Meng and M. Liu                                            | Remote-sensing image-based analysis of the patterns of urban heat islands in rapidly urbanizing Jinan, China                                                                               | International Journal of Remote Sensing            | Landsat series        | local-scale SUHI variations | Local       | Daytime       | Spring, Summer, Autumn |
| 193 | 2013 | M. Mohan, Y. Kikegawa, B. R. Gurjar, S. Bhati and N. R. Kolli | Assessment of urban heat island effect for different land use-land cover from micrometeorological measurements and remote sensing data for megacity Delhi                                  | Theoretical and Applied Climatology                | MODIS                 | surface-air UHIs            | Local       | Day and night | Spring                 |
| 194 | 2013 | S. W. Myint, E. A. Wentz, A. J. Brazel and D. A. Quattrochi   | The impact of distinct anthropogenic and vegetation features on urban warming                                                                                                              | Landscape Ecology                                  | ASTER                 | local-scale SUHI variations | Local       | Day and night | Summer, Winter         |
| 195 | 2013 | Z. Qiao, G. Tian and L. Xiao                                  | Diurnal and seasonal impacts of urbanization on the urban thermal environment: A case study of Beijing using MODIS data                                                                    | Isprs Journal of Photogrammetry and Remote Sensing | MODIS                 | local-scale SUHI variations | Local       | Day and night | All seasons            |
| 196 | 2013 | R. Sharma, A. Ghosh and P. K. Joshi                           | Analysing spatio-temporal footprints of urbanization on environment of Surat city using satellite-derived bio-physical parameters                                                          | Geocarto International                             | Landsat series        | local-scale SUHI variations | Local       | Daytime       | Autumn                 |

| No. | Year | Authors                                     | Title                                                                                                                                                    | Journal                                            | Sensor                | Research foci                | Study scale | Time-of-day   | Study Season   |
|-----|------|---------------------------------------------|----------------------------------------------------------------------------------------------------------------------------------------------------------|----------------------------------------------------|-----------------------|------------------------------|-------------|---------------|----------------|
| 197 | 2013 | R. Sun, Y. Lu, L. Chen, L. Yang and A. Chen | Assessing the stability of annual temperatures for different urban functional zones                                                                      | Building and Environment                           | Landsat series, ASTER | local-scale SUHI variations  | Local       | Daytime       | Summer, Autumn |
| 198 | 2013 | C. Y. Sung                                  | Mitigating surface urban heat island by a tree protection policy: A case study of The Woodland, Texas, USA                                               | Urban Forestry & Urban Greening                    | Landsat series        | Others                       | Local       | Daytime       |                |
| 199 | 2013 | M. S. Wong and J. E. Nichol                 | Spatial variability of frontal area index and its relationship with urban heat island intensity                                                          | International Journal of Remote Sensing            | ASTER                 | local-scale SUHI variations  | Local       | Nighttime     | Winter         |
| 200 | 2013 | C.-D. Wu, S.-C. C. Lung and J.-F. Jan       | Development of a 3-D urbanization index using digital terrain models for surface urban heat island effects                                               | Isprs Journal of Photogrammetry and Remote Sensing | MODIS                 | Others                       | Local       | Day and night | Summer         |
| 201 | 2013 | M. Xie, Y. Wang, Q. Chang, M. Fu and M. Ye  | Assessment of landscape patterns affecting land surface temperature in different biophysical gradients in Shenzhen, China                                | Urban Ecosystems                                   | Landsat series        | local-scale SUHI variations  | Local       | Daytime       | Autumn         |
| 202 | 2013 | H. Xu, D. Lin and F. Tang                   | The impact of impervious surface development on land surface temperature in a subtropical city: Xiamen, China                                            | International Journal of Climatology               | Landsat series        | local-scale SUHI variations  | Local       | Daytime       |                |
| 203 | 2013 | L. Y. Xu, X. D. Xie and S. Li               | Correlation analysis of the urban heat island effect and the spatial and temporal distribution of atmospheric particulates using TM images in Beijing    | Environmental Pollution                            | Landsat series        | Others                       | Local       | Daytime       | Spring, Winter |
| 204 | 2013 | Y. Zhang, I. O. A. Odeh and E. Ramadan      | Assessment of land surface temperature in relation to landscape metrics and fractional vegetation cover in an urban/peri-urban region using Landsat data | International Journal of Remote Sensing            | Landsat series        | local-scale SUHI variations  | Local       | Daytime       | Winter         |
| 205 | 2013 | B. Zhou, D. Rybski and J. P. Kropp          | On the statistics of urban heat island intensity                                                                                                         | Geophysical Research Letters                       | MODIS                 | SUHI variations among cities | Regional    | Day and night | All seasons    |
| 206 | 2013 | J. Zhou, Y. Chen, X. Zhang and W. Zhan      | Modelling the diurnal variations of urban heat islands with multi-source satellite data                                                                  | International Journal of Remote Sensing            | FY-AHVR RC, MODIS     | Others                       | Local       | Day and night | All seasons    |
| 207 | 2014 | M. P. Adams and P. L. Smith                 | A systematic approach to model the influence of the type and density of                                                                                  | Landscape and Urban Planning                       | MODIS                 | local-scale SUHI variations  | Local       | Day and night | Summer         |

| No. | Year | Authors                                                               | Title                                                                                                                               | Journal                                                                          | Sensor         | Research foci               | Study scale | Time-of-day   | Study Season |
|-----|------|-----------------------------------------------------------------------|-------------------------------------------------------------------------------------------------------------------------------------|----------------------------------------------------------------------------------|----------------|-----------------------------|-------------|---------------|--------------|
|     |      |                                                                       | vegetation cover on urban heat using remote sensing                                                                                 |                                                                                  |                |                             |             |               |              |
| 208 | 2014 | R. Anniballe, S. Bonafoni and M. Pichierri                            | Spatial and temporal trends of the surface and air heat island over Milan using MODIS data                                          | Remote Sensing of Environment                                                    | MODIS          | surface-air UHIs            | Local       | Day and night | Summer       |
| 209 | 2014 | F. B. Balcik                                                          | Determining the impact of urban components on land surface temperature of Istanbul by using remote sensing indices                  | Environmental Monitoring and Assessment                                          | Landsat series | local-scale SUHI variations | Local       | Daytime       | Autumn       |
| 210 | 2014 | A. Chen, L. Yao, R. Sun and L. Chen                                   | How many metrics are required to identify the effects of the landscape pattern on land surface temperature?                         | Ecological Indicators                                                            | Landsat series | local-scale SUHI variations | Local       | Daytime       | Summer       |
| 211 | 2014 | A. Chen, X. A. Yao, R. Sun and L. Chen                                | Effect of urban green patterns on surface urban cool islands and its seasonal variations                                            | Urban Forestry & Urban Greening                                                  | Landsat series | local-scale SUHI variations | Local       | Daytime       | All seasons  |
| 212 | 2014 | Y.-Y. Choi, M.-S. Suh and K.-H. Park                                  | Assessment of Surface Urban Heat Islands over Three Megacities in East Asia Using Land Surface Temperature Data Retrieved from COMS | Remote Sensing                                                                   | COMS           | local-scale SUHI variations | Local       | Day and night | All seasons  |
| 213 | 2014 | B. Chun and J. M. Guldmann                                            | Spatial statistical analysis and simulation of the urban heat island in high-density central cities                                 | Landscape and Urban Planning                                                     | Landsat series | Others                      | Local       | Daytime       | Summer       |
| 214 | 2014 | H. Feng, H. Liu and L. Wu                                             | Monitoring the Relationship Between the Land Surface Temperature Change and Urban Growth in Beijing, China                          | Ieee Journal of Selected Topics in Applied Earth Observations and Remote Sensing | Landsat series | local-scale SUHI variations | Local       | Daytime       | Spring       |
| 215 | 2014 | H. Feng, X. Zhao, F. Chen and L. Wu                                   | Using land use change trajectories to quantify the effects of urbanization on urban heat island                                     | Advances in Space Research                                                       | Landsat series | local-scale SUHI variations | Local       | Daytime       | Winter       |
| 216 | 2014 | G. L. Feyisa, K. Dons and H. Meilby                                   | Efficiency of parks in mitigating urban heat island effect: An example from Addis Ababa                                             | Landscape and Urban Planning                                                     | Landsat series | local-scale SUHI variations | Local       | Daytime       | Spring       |
| 217 | 2014 | H. C. Ho, A. Knudby, P. Sirovyak, Y. Xu, M. Hodul and S. B. Henderson | Mapping maximum urban air temperature on hot summer days                                                                            | Remote Sensing of Environment                                                    | Landsat series | surface-air UHIs            | Local       | Daytime       | Summer       |



| No. | Year | Authors                                                                                               | Title                                                                                                                                         | Journal                                            | Sensor         | Research foci               | Study scale | Time-of-day   | Study Season |
|-----|------|-------------------------------------------------------------------------------------------------------|-----------------------------------------------------------------------------------------------------------------------------------------------|----------------------------------------------------|----------------|-----------------------------|-------------|---------------|--------------|
| 218 | 2014 | F. Kong, H. Yin, P. James, L. R. Hutya and H. S. He                                                   | Effects of spatial pattern of greenspace on urban cooling in a large metropolitan area of eastern China                                       | Landscape and Urban Planning                       | Landsat series | local-scale SUHI variations | Local       | Daytime       | Summer       |
| 219 | 2014 | F. Kong, H. Yin, C. Wang, G. Cavan and P. James                                                       | A satellite image-based analysis of factors contributing to the green-space cool island intensity on a city scale                             | Urban Forestry & Urban Greening                    | Landsat series | local-scale SUHI variations | Local       | Daytime       | Summer       |
| 220 | 2014 | C.-f. Li, D. Shen, J.-s. Dong, J.-y. Yin, J.-j. Zhao and D. Xue                                       | Monitoring of urban heat island in Shanghai, China, from 1981 to 2010 with satellite data                                                     | Arabian Journal of Geosciences                     | Landsat series | local-scale SUHI variations | Local       | Daytime       | Autumn       |
| 221 | 2014 | L. Li, Y. Tan, S. Ying, Z. Yu, Z. Li and H. Lan                                                       | Impact of land cover and population density on land surface temperature: case study in Wuhan, China                                           | Journal of Applied Remote Sensing                  | Landsat series | local-scale SUHI variations | Local       | Daytime       | Autumn       |
| 222 | 2014 | W. Li, Y. Bai, Q. Chen, K. He, X. Ji and C. Han                                                       | Discrepant impacts of land use and land cover on urban heat islands: A case study of Shanghai, China                                          | Ecological Indicators                              | Landsat series | local-scale SUHI variations | Local       | Daytime       | Autumn       |
| 223 | 2014 | K. Liu, X. Zhang, X. Li and H. Jiang                                                                  | Multiscale analysis of urban thermal characteristics: case study of Shijiazhuang, China                                                       | Journal of Applied Remote Sensing                  | Landsat series | local-scale SUHI variations | Local       | Daytime       | Summer       |
| 224 | 2014 | X. Luo and W. Li                                                                                      | Scale effect analysis of the relationships between urban heat island and impact factors: case study in Chongqing                              | Journal of Applied Remote Sensing                  | Landsat series | local-scale SUHI variations | Local       | Daytime       | Spring       |
| 225 | 2014 | M. Maimaitiyiming, A. Ghulam, T. Tiyip, F. Pla, P. Latorre-Carmona, U. Halik, M. Sawut and M. Caetano | Effects of green space spatial pattern on land surface temperature: Implications for sustainable urban planning and climate change adaptation | Isprs Journal of Photogrammetry and Remote Sensing | Landsat series | local-scale SUHI variations | Local       | Daytime       | Summer       |
| 226 | 2014 | F. Meng, B. Shan and M. Liu                                                                           | Remote-sensing evaluation of the relationship between urban heat islands and urban biophysical descriptors in Jinan, China                    | Journal of Applied Remote Sensing                  | Landsat series | local-scale SUHI variations | Local       | Daytime       | Summer       |
| 227 | 2014 | E. Parlow, R. Vogt and C. Feigenwinter                                                                | The urban heat island of Basel - seen from different perspectives                                                                             | Erde                                               | Landsat series | surface-air UHIs            | Local       | Daytime       | Summer       |
| 228 | 2014 | J. Quan, Y. Chen, W. Zhan, J. Wang, J. Voogt                                                          | Multi-temporal trajectory of the urban heat island centroid in Beijing, China based on a                                                      | Remote Sensing of Environment                      | MODIS          | local-scale SUHI variations | Local       | Day and night | All seasons  |

| No. | Year | Authors                                                    | Title                                                                                                                                                      | Journal                                                               | Sensor               | Research foci               | Study scale | Time-of-day   | Study Season           |
|-----|------|------------------------------------------------------------|------------------------------------------------------------------------------------------------------------------------------------------------------------|-----------------------------------------------------------------------|----------------------|-----------------------------|-------------|---------------|------------------------|
|     |      | and M. Wang                                                | Gaussian volume model                                                                                                                                      |                                                                       |                      |                             |             |               |                        |
| 229 | 2014 | F. Ramdani and P. Setiani                                  | Spatio-temporal analysis of urban temperature in Bandung City, Indonesia                                                                                   | Urban Ecosystems                                                      | Landsat series       | local-scale SUHI variations | Local       | Daytime       | Summer                 |
| 230 | 2014 | J. Rhee, S. Park and Z. Lu                                 | Relationship between land cover patterns and surface temperature in urban areas                                                                            | Giscience & Remote Sensing                                            | Landsat series       | local-scale SUHI variations | Local       | Daytime       | Spring, Summer, Autumn |
| 231 | 2014 | B. Song and K. Park                                        | Validation of ASTER Surface Temperature Data with In Situ Measurements to Evaluate Heat Islands in Complex Urban Areas                                     | Advances in Meteorology                                               | ASTER                | Others                      | Local       | Day and night | Summer, Autumn         |
| 232 | 2014 | J. Song, S. Du, X. Feng and L. Guo                         | The relationships between landscape compositions and land surface temperature: Quantifying their resolution sensitivity with spatial regression models     | Landscape and Urban Planning                                          | Landsat series       | local-scale SUHI variations | Local       | Daytime       | Spring                 |
| 233 | 2014 | J. P. Walawender, M. Szymanowski, M. J. Hajto and A. Bokwa | Land Surface Temperature Patterns in the Urban Agglomeration of Krakow (Poland) Derived from Landsat-7/ETM+ Data                                           | Pure and Applied Geophysics                                           | Landsat series       | local-scale SUHI variations | Local       | Daytime       | Spring, Summer         |
| 234 | 2014 | Q. Weng and P. Fu                                          | Modeling diurnal land temperature cycles over Los Angeles using downscaled GOES imagery                                                                    | Isprs Journal of Photogrammetry and Remote Sensing                    | GOES                 | Others                      | Local       | Day and night | All seasons            |
| 235 | 2014 | Q. Weng and P. Fu                                          | Modeling annual parameters of clear-sky land surface temperature variations and evaluating the impact of cloud cover using time series of Landsat TIR data | Remote Sensing of Environment                                         | Landsat series       | Others                      | Local       | Daytime       | All seasons            |
| 236 | 2014 | H. Wu, L.-P. Ye, W.-Z. Shi and K. C. Clarke                | Assessing the effects of land use spatial structure on urban heat islands using HJ-1B remote sensing imagery in Wuhan, China                               | International Journal of Applied Earth Observation and Geoinformation | HJ-B, Landsat series | local-scale SUHI variations | Local       | Daytime       | Summer                 |
| 237 | 2014 | Y. A. Yusuf, B. Pradhan and M. O. Idrees                   | Spatio-temporal Assessment of Urban Heat Island Effects in Kuala Lumpur Metropolitan City Using Landsat Images                                             | Journal of the Indian Society of Remote Sensing                       | Landsat series       | local-scale SUHI variations | Local       | Daytime       |                        |
| 238 | 2014 | W. Zhan, W. Ju, S. Hai, G. Ferguson, J. Quan, C.           | Satellite-Derived Subsurface Urban Heat Island                                                                                                             | Environmental Science & Technology                                    | MODIS                | Others                      | Local       | Day and night | All seasons            |

| No. | Year | Authors                                                                                                                                                                                        | Title                                                                                                                                                                                              | Journal                                  | Sensor         | Research foci                | Study scale | Time-of-day   | Study Season           |
|-----|------|------------------------------------------------------------------------------------------------------------------------------------------------------------------------------------------------|----------------------------------------------------------------------------------------------------------------------------------------------------------------------------------------------------|------------------------------------------|----------------|------------------------------|-------------|---------------|------------------------|
|     |      | Tang, Z. Guo and F. Kong                                                                                                                                                                       |                                                                                                                                                                                                    |                                          |                |                              |             |               |                        |
| 239 | 2014 | F. Zhang, X. Cai and J. E. Thornes                                                                                                                                                             | Birmingham's air and surface urban heat islands associated with Lamb weather types and cloudless anticyclonic conditions                                                                           | Progress in Physical Geography           | MODIS          | surface-air UHIs             | Local       | Day and night | All seasons            |
| 240 | 2014 | L. Zhao, X. Lee, R. B. Smith and K. Oleson                                                                                                                                                     | Strong contributions of local background climate to urban heat islands                                                                                                                             | Nature                                   | MODIS          | SUHI variations among cities | Regional    | Day and night | Annual mean            |
| 241 | 2014 | B. Zheng, S. W. Myint and C. Fan                                                                                                                                                               | Spatial configuration of anthropogenic land cover impacts on urban warming                                                                                                                         | Landscape and Urban Planning             | ASTER          | local-scale SUHI variations  | Local       | Day and night | Summer                 |
| 242 | 2014 | D. Zhou, S. Zhao, S. Liu, L. Zhang and C. Zhu                                                                                                                                                  | Surface urban heat island in China's 32 major cities: Spatial patterns and drivers                                                                                                                 | Remote Sensing of Environment            | MODIS          | SUHI variations among cities | Regional    | Day and night | All seasons            |
| 243 | 2014 | W. Zhou, Y. Qian, X. Li, W. Li and L. Han                                                                                                                                                      | Relationships between land cover and the surface urban heat island: seasonal variability and effects of spatial and thematic resolution of land cover data on predicting land surface temperatures | Landscape Ecology                        | Landsat series | local-scale SUHI variations  | Local       | Daytime       | All seasons            |
| 244 | 2015 | S. Alavipanah, M. Wegmann, S. Qureshi, Q. Weng and T. Koellner                                                                                                                                 | The Role of Vegetation in Mitigating Urban Land Surface Temperatures: A Case Study of Munich, Germany during the Warm Season                                                                       | Sustainability                           | MODIS          | local-scale SUHI variations  | Local       | Daytime       | Summer                 |
| 245 | 2015 | R. V. Araujo, M. R. Albertini, A. L. Costa-da-Silva, L. Suesdek, N. C. Soares Franceschi, N. M. Bastos, G. Katz, V. A. Cardoso, B. C. Castro, M. L. Capurro and V. L. Anacleto Cardoso Allegro | Sao Paulo urban heat islands have a higher incidence of dengue than other urban areas                                                                                                              | Brazilian Journal of Infectious Diseases | Landsat series | Others                       | Local       | Daytime       | Spring, Summer, Autumn |
| 246 | 2015 | A. Asgarian, B. J. Amiri and Y. Sakieh                                                                                                                                                         | Assessing the effect of green cover spatial patterns on urban land surface temperature using landscape metrics approach                                                                            | Urban Ecosystems                         | Landsat series | local-scale SUHI variations  | Local       | Daytime       | Spring                 |
| 247 | 2015 | S. Bonafoni                                                                                                                                                                                    | Spectral index utility for summer urban heating analysis                                                                                                                                           | Journal of Applied Remote Sensing        | Landsat series | Others                       | Local       | Daytime       | Summer                 |

| No. | Year | Authors                                                               | Title                                                                                                  | Journal                                      | Sensor                | Research foci                | Study scale | Time-of-day   | Study Season   |
|-----|------|-----------------------------------------------------------------------|--------------------------------------------------------------------------------------------------------|----------------------------------------------|-----------------------|------------------------------|-------------|---------------|----------------|
| 248 | 2015 | S. D. Chakraborty, Y. Kant and D. Mitra                               | Assessment of land surface temperature and heat fluxes over Delhi using remote sensing data            | Journal of Environmental Management          | Landsat series, MODIS | local-scale SUHI variations  | Local       | Daytime       | Summer, Winter |
| 249 | 2015 | X. Cheng, B. Wei, G. Chen, J. Li and C. Song                          | Influence of Park Size and Its Surrounding Urban Landscape Patterns on the Park Cooling Effect         | Journal of Urban Planning and Development    | Landsat series        | local-scale SUHI variations  | Local       | Daytime       | Summer         |
| 250 | 2015 | S. Cheval and A. Dumitrescu                                           | The summer surface urban heat island of Bucharest (Romania) retrieved from MODIS images                | Theoretical and Applied Climatology          | MODIS                 | local-scale SUHI variations  | Local       | Day and night | Summer         |
| 251 | 2015 | O. Corumluoglu and I. Asri                                            | The effect of urban heat island on Izmir's city ecosystem and climate                                  | Environmental Science and Pollution Research | Landsat series        | local-scale SUHI variations  | Local       | Daytime       | Summer         |
| 252 | 2015 | M. Dihkan, F. Karsli, A. Guneroglu and N. Guneroglu                   | Evaluation of surface urban heat island (SUHI) effect on coastal zone: The case of Istanbul Megacity   | Ocean & Coastal Management                   | Landsat series        | local-scale SUHI variations  | Local       | Daytime       | Summer         |
| 253 | 2015 | C. Fan, S. W. Myint and B. Zheng                                      | Measuring the spatial arrangement of urban vegetation and its impacts on seasonal surface temperatures | Progress in Physical Geography               | ASTER                 | local-scale SUHI variations  | Local       | Day and night | Summer, Winter |
| 254 | 2015 | P. Fu and Q. Weng                                                     | Temporal Dynamics of Land Surface Temperature From Landsat TIR Time Series Images                      | Ieee Geoscience and Remote Sensing Letters   | Landsat series        | local-scale SUHI variations  | Local       | Daytime       | Spring         |
| 255 | 2015 | G. Guo, Z. Wu, R. Xiao, Y. Chen, X. Liu and X. Zhang                  | Impacts of urban biophysical composition on land surface temperature in urban heat island clusters     | Landscape and Urban Planning                 | Landsat series        | local-scale SUHI variations  | Local       | Daytime       | Summer         |
| 256 | 2015 | A. Gusso, C. Cafruni, F. Bordin, M. R. Veronez, L. Lenz and S. Crijja | Multi-Temporal Patterns of Urban Heat Island as Response to Economic Growth Management                 | Sustainability                               | Landsat series        | local-scale SUHI variations  | Local       | Daytime       | Summer         |
| 257 | 2015 | M. Heinl, A. Hammerle, U. Tappeiner and G. Leitinger                  | Determinants of urban-rural land surface temperature differences - A landscape scale perspective       | Landscape and Urban Planning                 | Landsat series        | SUHI variations among cities | Regional    | Daytime       | Summer         |
| 258 | 2015 | L. Hu and N. A. Brunsell                                              | A new perspective to assess the urban heat island through remotely sensed atmospheric profiles         | Remote Sensing of Environment                | MODIS                 | Others                       | Local       | Day and night | Summer         |

| No. | Year | Authors                                                                                                               | Title                                                                                                                                                                    | Journal                                        | Sensor                | Research foci                | Study scale | Time-of-day   | Study Season           |
|-----|------|-----------------------------------------------------------------------------------------------------------------------|--------------------------------------------------------------------------------------------------------------------------------------------------------------------------|------------------------------------------------|-----------------------|------------------------------|-------------|---------------|------------------------|
| 259 | 2015 | L. Hu, A. J. Monaghan and N. A. Brunsell                                                                              | Investigation of Urban Air Temperature and Humidity Patterns during Extreme Heat Conditions Using Satellite-Derived Data                                                 | Journal of Applied Meteorology and Climatology | Landsat series        | surface-air UHIs             | Local       | Day and night | Summer                 |
| 260 | 2015 | Y. Hu, G. Jia, M. Hou, X. Zhang, F. Zheng and Y. Liu                                                                  | The cumulative effects of urban expansion on land surface temperatures in metropolitan Jingjintang, China                                                                | Journal of Geophysical Research-Atmospheres    | MODIS                 | SUHI variations among cities | Regional    | Day and night | All seasons            |
| 261 | 2015 | C. Huang and X. Ye                                                                                                    | Spatial Modeling of Urban Vegetation and Land Surface Temperature: A Case Study of Beijing                                                                               | Sustainability                                 | Landsat series, ASTER | local-scale SUHI variations  | Local       | Daytime       | Spring, Summer, Autumn |
| 262 | 2015 | W. Huang, Y. Zeng and S. Li                                                                                           | An analysis of urban expansion and its associated thermal characteristics using Landsat imagery                                                                          | Geocarto International                         | Landsat series        | local-scale SUHI variations  | Local       | Daytime       | Summer, Autumn         |
| 263 | 2015 | Y. Jiang, P. Fu and Q. Weng                                                                                           | Downscaling GOES Land Surface Temperature for Assessing Heat Wave Health Risks                                                                                           | Ieee Geoscience and Remote Sensing Letters     | GOES                  | Others                       | Local       | Daytime       | Summer                 |
| 264 | 2015 | Y. Jiang, P. Fu and Q. Weng                                                                                           | Assessing the Impacts of Urbanization-Associated Land Use/Cover Change on Land Surface Temperature and Surface Moisture: A Case Study in the Midwestern United States    | Remote Sensing                                 | Landsat series        | local-scale SUHI variations  | Local       | Daytime       | Summer                 |
| 265 | 2015 | P. I. Konstantinov, M. Y. Grishchenko and M. I. Varentsov                                                             | Mapping Urban Heat Islands of Arctic Cities Using Combined Data on Field Measurements and Satellite Images Based on the Example of the City of Apatity (Murmansk Oblast) | Izvestiya Atmospheric and Oceanic Physics      | MODIS                 | surface-air UHIs             | Local       | Nighttime     | Winter                 |
| 266 | 2015 | K. Kourtidis, A. K. Georgoulis, S. Rapsomanikis, V. Amiridis, I. Keramitsoglou, H. Hooyberghs, B. Maiheu and D. Melas | A study of the hourly variability of the urban heat island effect in the Greater Athens Area during summer                                                               | Science of the Total Environment               | AHVR, MODIS, ASTER    | Others                       | Local       | Day and night | Summer                 |

| No. | Year | Authors                                                                         | Title                                                                                                                                                         | Journal                                         | Sensor         | Research foci                | Study scale | Time-of-day   | Study Season   |
|-----|------|---------------------------------------------------------------------------------|---------------------------------------------------------------------------------------------------------------------------------------------------------------|-------------------------------------------------|----------------|------------------------------|-------------|---------------|----------------|
| 267 | 2015 | W. Kuang, Y. Liu, Y. Dou, W. Chi, G. Chen, C. Gao, T. Yang, J. Liu and R. Zhang | What are hot and what are not in an urban landscape: quantifying and explaining the land surface temperature pattern in Beijing, China                        | Landscape Ecology                               | MODIS          | local-scale SUHI variations  | Local       | Daytime       | Autumn         |
| 268 | 2015 | M. Lazzarini, A. Molini, P. R. Marpu, T. B. M. J. Ouarda and H. Ghedira         | Urban climate modifications in hot desert cities: The role of land cover, local climate, and seasonality                                                      | Geophysical Research Letters                    | MODIS          | SUHI variations among cities | Global      | Day and night | All seasons    |
| 269 | 2015 | W. Lin, T. Yu, X. Chang, W. Wu and Y. Zhang                                     | Calculating cooling extents of green parks using remote sensing: Method and test                                                                              | Landscape and Urban Planning                    | Landsat series | local-scale SUHI variations  | Local       | Daytime       | Autumn         |
| 270 | 2015 | K. Liu, H. Su, L. Zhang, H. Yang, R. Zhang and X. Li                            | Analysis of the Urban Heat Island Effect in Shijiazhuang, China Using Satellite and Airborne Data                                                             | Remote Sensing                                  | Landsat series | local-scale SUHI variations  | Local       | Daytime       | Summer, Autumn |
| 271 | 2015 | D. Lu, K. Song, S. Zang, M. Jia, J. Du and C. Ren                               | The Effect of Urban Expansion on Urban Surface Temperature in Shenyang, China: an Analysis with Landsat Imagery                                               | Environmental Modeling & Assessment             | Landsat series | local-scale SUHI variations  | Local       | Daytime       | Summer         |
| 272 | 2015 | P. Martin, Y. Baudouin and P. Gachon                                            | An alternative method to characterize the surface urban heat island                                                                                           | International Journal of Biometeorology         | Landsat series | Others                       | Local       | Daytime       | Summer         |
| 273 | 2015 | M. Mohan and A. Kandya                                                          | Impact of urbanization and land-use/land-cover change on diurnal temperature range: A case study of tropical urban airshed of India using remote sensing data | Science of the Total Environment                | MODIS          | local-scale SUHI variations  | Local       | Day and night | Annual mean    |
| 274 | 2015 | Q. Nie and J. Xu                                                                | Understanding the effects of the impervious surfaces pattern on land surface temperature in an urban area                                                     | Frontiers of Earth Science                      | Landsat series | local-scale SUHI variations  | Local       | Daytime       | Not available  |
| 275 | 2015 | J. O. Odindi, V. Bangamwabo and O. Mutanga                                      | Assessing the Value of Urban Green Spaces in Mitigating Multi-Seasonal Urban Heat using MODIS Land Surface Temperature (LST) and Landsat 8 data               | International Journal of Environmental Research | MODIS          | local-scale SUHI variations  | Local       | Day and night | All seasons    |
| 276 | 2015 | J. Pan                                                                          | Analysis of human factors on urban heat island and simulation of urban thermal environment in Lanzhou city, China                                             | Journal of Applied Remote Sensing               | Landsat series | local-scale SUHI variations  | Local       | Daytime       | Summer         |

| No. | Year | Authors                                                           | Title                                                                                                                                                     | Journal                                          | Sensor                | Research foci                | Study scale | Time-of-day   | Study Season   |
|-----|------|-------------------------------------------------------------------|-----------------------------------------------------------------------------------------------------------------------------------------------------------|--------------------------------------------------|-----------------------|------------------------------|-------------|---------------|----------------|
| 277 | 2015 | K. Raghavan, V. Mandla and S. Franco                              | Influence of urban areas on environment: Special reference to building materials and temperature anomalies using geospatial technology                    | Sustainable Cities and Society                   | Landsat series        | local-scale SUHI variations  | Local       | Daytime       | Spring         |
| 278 | 2015 | Z. Ren, H. Zheng, X. He, D. Zhang and X. Yu                       | Estimation of the Relationship Between Urban Vegetation Configuration and Land Surface Temperature with Remote Sensing                                    | Journal of the Indian Society of Remote Sensing  | Landsat series        | local-scale SUHI variations  | Local       | Daytime       | Summer         |
| 279 | 2015 | N. Schwarz and A. M. Manceur                                      | Analyzing the Influence of Urban Forms on Surface Urban Heat Islands in Europe                                                                            | Journal of Urban Planning and Development        | MODIS                 | SUHI variations among cities | Regional    | Day and night | Summer         |
| 280 | 2015 | G. Shen, A. N. Ibrahim, Z. Wang, C. Ma and J. Gong                | Spatial-temporal land-use/land-cover dynamics and their impacts on surface temperature in Chongming Island of Shanghai, China                             | International Journal of Remote Sensing          | Landsat series        | local-scale SUHI variations  | Local       | Daytime       | Summer         |
| 281 | 2015 | L. Shen, X. Guo and K. Xiao                                       | Spatiotemporally characterizing urban temperatures based on remote sensing and GIS analysis: a case study in the city of Saskatoon (SK, Canada)           | Open Geosciences                                 | Landsat series, MODIS | surface-air UHIs             | Local       | Daytime       | All seasons    |
| 282 | 2015 | L. Sheng, D. Lu and J. Huang                                      | Impacts of land-cover types on an urban heat island in Hangzhou, China                                                                                    | International Journal of Remote Sensing          | HJ- B, Landsat series | surface-air UHIs             | Local       | Daytime       | Spring         |
| 283 | 2015 | H. Sun, Y. Chen and W. Zhan                                       | Comparing surface- and canopy-layer urban heat islands over Beijing using MODIS data                                                                      | International Journal of Remote Sensing          | MODIS                 | surface-air UHIs             | Local       | Day and night | All seasons    |
| 284 | 2015 | O. Van Nguyen, K. Kawamura, D. P. Trong, Z. Gong and E. Suwandana | Temporal change and its spatial variety on land surface temperature and land use changes in the Red River Delta, Vietnam, using MODIS time-series imagery | Environmental monitoring and assessment          | MODIS                 | SUHI variations among cities | Regional    | Day and night | All seasons    |
| 285 | 2015 | J. Wang, B. Huang, D. Fu and P. M. Atkinson                       | Spatiotemporal Variation in Surface Urban Heat Island Intensity and Associated Determinants across Major Chinese Cities                                   | Remote Sensing                                   | MODIS                 | SUHI variations among cities | Regional    | Day and night | All seasons    |
| 286 | 2015 | Q. Xie and Z. Zhou                                                | IMPACT OF URBANIZATION ON URBAN HEAT ISLAND EFFECT BASED ON TM IMAGERY IN WUHAN, CHINA                                                                    | Environmental Engineering and Management Journal | Landsat series        | local-scale SUHI variations  | Local       | Daytime       | Spring, Autumn |

| No. | Year | Authors                                                         | Title                                                                                                                                                                                   | Journal                                                               | Sensor                | Research foci                | Study scale | Time-of-day   | Study Season   |
|-----|------|-----------------------------------------------------------------|-----------------------------------------------------------------------------------------------------------------------------------------------------------------------------------------|-----------------------------------------------------------------------|-----------------------|------------------------------|-------------|---------------|----------------|
| 287 | 2015 | B. Yang, F. Meng, X. Ke and C. Ma                               | The Impact Analysis of Water Body Landscape Pattern on Urban Heat Island: A Case Study of Wuhan City                                                                                    | Advances in Meteorology                                               | Landsat series        | local-scale SUHI variations  | Local       | Daytime       | Autumn         |
| 288 | 2015 | Y. Zhang, H. Balzter, C. Zou, H. Xu and F. Tang                 | Characterizing bi-temporal patterns of land surface temperature using landscape metrics based on sub-pixel classifications from Landsat TM/ETM                                          | International Journal of Applied Earth Observation and Geoinformation | Landsat series        | local-scale SUHI variations  | Local       | Daytime       | Spring, Summer |
| 289 | 2015 | Y. Zhang, A. Harris and H. Balzter                              | Characterizing fractional vegetation cover and land surface temperature based on sub-pixel fractional impervious surfaces from Landsat TM/ETM                                           | International Journal of Remote Sensing                               | Landsat series        | Others                       | Local       | Daytime       | Spring, Summer |
| 290 | 2015 | D. Zhou, S. Zhao, L. Zhang, G. Sun and Y. Liu                   | The footprint of urban heat island effect in China                                                                                                                                      | Scientific Reports                                                    | MODIS                 | SUHI variations among cities | Regional    | Day and night | All seasons    |
| 291 | 2016 | A. Ayanlade                                                     | Seasonality in the daytime and night-time intensity of land surface temperature in a tropical city area                                                                                 | Science of the Total Environment                                      | MODIS                 | local-scale SUHI variations  | Local       | Day and night | All seasons    |
| 292 | 2016 | J. A. Azevedo, L. Chapman and C. L. Muller                      | Quantifying the Daytime and Night-Time Urban Heat Island in Birmingham, UK: A Comparison of Satellite Derived Land Surface Temperature and High Resolution Air Temperature Observations | Remote Sensing                                                        | MODIS                 | surface-air UHIs             | Local       | Day and night | Summer         |
| 293 | 2016 | H. Bahi, H. Rhinane, A. Bensalmia, U. Fehrenbach and D. Scherer | Effects of Urbanization and Seasonal Cycle on the Surface Urban Heat Island Patterns in the Coastal Growing Cities: A Case Study of Casablanca, Morocco                                 | Remote Sensing                                                        | Landsat series, MODIS | local-scale SUHI variations  | Local       | Day and night | All seasons    |
| 294 | 2016 | T. Bao, X. Li, J. Zhang, Y. Zhang and S. Tian                   | Assessing the Distribution of Urban Green Spaces and its Anisotropic Cooling Distance on Urban Heat Island Pattern in Baotou, China                                                     | Isprs International Journal of Geo-Information                        | Landsat series        | local-scale SUHI variations  | Local       | Daytime       | Summer         |
| 295 | 2016 | S. A. Benz, P. Bayer, F. M. Goettsche, F. S. Olesen and P. Blum | Linking Surface Urban Heat Islands with Groundwater Temperatures                                                                                                                        | Environmental Science & Technology                                    | MODIS                 | Others                       | Local       | Day and night | All seasons    |



| No. | Year | Authors                                                           | Title                                                                                                                                                        | Journal                                     | Sensor         | Research foci                | Study scale | Time-of-day   | Study Season   |
|-----|------|-------------------------------------------------------------------|--------------------------------------------------------------------------------------------------------------------------------------------------------------|---------------------------------------------|----------------|------------------------------|-------------|---------------|----------------|
| 296 | 2016 | M. Bokaie, M. K. Zarkesh, P. D. Arasteh and A. Hosseini           | Assessment of Urban Heat Island based on the relationship between land surface temperature and Land Use/Land Cover in Tehran                                 | Sustainable Cities and Society              | Landsat series | local-scale SUHI variations  | Local       | Daytime       | Summer         |
| 297 | 2016 | V. Bourscheidt, O. Pinto, Jr. and K. P. Naccarato                 | The effects of Sao Paulo urban heat island on lightning activity: Decadal analysis (1999-2009)                                                               | Journal of Geophysical Research-Atmospheres | MODIS          | Others                       | Local       | Day and night | All seasons    |
| 298 | 2016 | Y. Cai, H. Zhang, P. Zheng and W. Pan                             | Quantifying the Impact of Land use/Land Cover Changes on the Urban Heat Island: A Case Study of the Natural Wetlands Distribution Area of Fuzhou City, China | Wetlands                                    | Landsat series | local-scale SUHI variations  | Local       | Daytime       | Spring, Summer |
| 299 | 2016 | C. Cao, X. Lee, S. Liu, N. Schultz, W. Xiao, M. Zhang and L. Zhao | Urban heat islands in China enhanced by haze pollution                                                                                                       | Nature Communications                       | MODIS          | SUHI variations among cities | Regional    | Day and night | Annual mean    |
| 300 | 2016 | V. R. Chejarla, P. K. Maheshuni and V. R. Mandla                  | Quantification of LST and CO2 levels using Landsat-8 thermal bands on urban environment                                                                      | Geocarto International                      | Landsat series | surface-air UHIs             | Local       | Daytime       | Spring         |
| 301 | 2016 | L. Chen, R. Jiang and W.-N. Xiang                                 | Surface Heat Island in Shanghai and Its Relationship with Urban Development from 1989 to 2013                                                                | Advances in Meteorology                     | Landsat series | local-scale SUHI variations  | Local       | Daytime       | Summer         |
| 302 | 2016 | Y. Cui, X. Xu, J. Dong and Y. Qin                                 | Influence of Urbanization Factors on Surface Urban Heat Island Intensity: A Comparison of Countries at Different Developmental Phases                        | Sustainability                              | MODIS          | SUHI variations among cities | Global      | Not available | Not available  |
| 303 | 2016 | D. Das Majumdar and A. Biswas                                     | Quantifying land surface temperature change from LISA clusters: An alternative approach to identifying urban land use transformation                         | Landscape and Urban Planning                | Landsat series | local-scale SUHI variations  | Local       | Daytime       | Winter         |
| 304 | 2016 | K. Deilami, M. Kamruzzaman and J. F. Hayes                        | Correlation or Causality between Land Cover Patterns and the Urban Heat Island Effect? Evidence from Brisbane, Australia                                     | Remote Sensing                              | Landsat series | local-scale SUHI variations  | Local       | Daytime       | Not available  |

| No. | Year | Authors                                                       | Title                                                                                                                                                                    | Journal                            | Sensor                | Research foci                | Study scale | Time-of-day   | Study Season   |
|-----|------|---------------------------------------------------------------|--------------------------------------------------------------------------------------------------------------------------------------------------------------------------|------------------------------------|-----------------------|------------------------------|-------------|---------------|----------------|
| 305 | 2016 | H. Du, D. Wang, Y. Wang, X. Zhao, F. Qin, H. Jiang and Y. Cai | Influences of land cover types, meteorological conditions, anthropogenic heat and urban area on surface urban heat island in the Yangtze River Delta Urban Agglomeration | Science of the Total Environment   | MODIS                 | SUHI variations among cities | Regional    | Day and night | All seasons    |
| 306 | 2016 | S. Du, Z. Xiong, Y.-C. Wang and L. Guo                        | Quantifying the multilevel effects of landscape composition and configuration on land surface temperature                                                                | Remote Sensing of Environment      | Landsat series        | local-scale SUHI variations  | Local       | Daytime       | Autumn         |
| 307 | 2016 | X. Feng and S. W. Myint                                       | Exploring the effect of neighboring land cover pattern on land surface temperature of central building objects                                                           | Building and Environment           | ASTER                 | local-scale SUHI variations  | Local       | Daytime       | Summer         |
| 308 | 2016 | P. Fu and Q. Weng                                             | Consistent land surface temperature data generation from irregularly spaced Landsat imagery                                                                              | Remote Sensing of Environment      | Landsat series        | surface-air UHIs             | Local       | Daytime       | All seasons    |
| 309 | 2016 | P. Fu and Q. Weng                                             | A time series analysis of urbanization induced land. use and land cover change and its impact on land surface temperature with Landsat imagery                           | Remote Sensing of Environment      | Landsat series        | local-scale SUHI variations  | Local       | Daytime       | All seasons    |
| 310 | 2016 | L. Gawuc and J. Struzewska                                    | Impact of MODIS Quality Control on Temporally Aggregated Urban Surface Temperature and Long-Term Surface Urban Heat Island Intensity                                     | Remote Sensing                     | MODIS                 | Others                       | Local       | Day and night | All seasons    |
| 311 | 2016 | J. Geletic, M. Lehnert and P. Dobrovolny                      | Land Surface Temperature Differences within Local Climate Zones, Based on Two Central European Cities                                                                    | Remote Sensing                     | Landsat series, ASTER | local-scale SUHI variations  | Local       | Daytime       | Spring, Summer |
| 312 | 2016 | G. Guo, X. Zhou, Z. Wu, R. Xiao and Y. Chen                   | Characterizing the impact of urban morphology heterogeneity on land surface temperature in Guangzhou, China                                                              | Environmental Modelling & Software | Landsat series        | local-scale SUHI variations  | Local       | Daytime       | Autumn         |
| 313 | 2016 | S. Haashemi, Q. Weng, A. Darvishi and S. K. Alavipanah        | Seasonal Variations of the Surface Urban Heat Island in a Semi-Arid City                                                                                                 | Remote Sensing                     | MODIS                 | local-scale SUHI variations  | Local       | Day and night | All seasons    |
| 314 | 2016 | P. Hao, Z. Niu, Y. Zhan, Y. Wu, L. Wang and Y.                | Spatiotemporal changes of urban impervious surface area and land surface                                                                                                 | Giscience & Remote Sensing         | Landsat series        | local-scale SUHI variations  | Local       | Daytime       | Autumn         |

| No. | Year | Authors                                                                  | Title                                                                                                                                                                                        | Journal                                                           | Sensor         | Research foci                | Study scale | Time-of-day   | Study Season |
|-----|------|--------------------------------------------------------------------------|----------------------------------------------------------------------------------------------------------------------------------------------------------------------------------------------|-------------------------------------------------------------------|----------------|------------------------------|-------------|---------------|--------------|
|     |      | Liu                                                                      | temperature in Beijing from 1990 to 2014                                                                                                                                                     |                                                                   |                |                              |             |               |              |
| 315 | 2016 | H. C. Ho, A. Knudby, Y. Xu, M. Hodul and M. Aminipouri                   | A comparison of urban heat islands mapped using skin temperature, air temperature, and apparent temperature (Humidex), for the greater Vancouver area                                        | Science of the Total Environment                                  | Landsat series | surface-air UHIs             | Local       | Daytime       | Summer       |
| 316 | 2016 | L. Hu, A. Monaghan, J. A. Voogt and M. Barlage                           | A first satellite-based observational assessment of urban thermal anisotropy                                                                                                                 | Remote Sensing of Environment                                     | MODIS          | Others                       | Local       | Day and night | Summer       |
| 317 | 2016 | F. Huang, W. Zhan, J. Voogt, L. Hu, Z. Wang, J. Quan, W. Ju and Z. Guo   | Temporal upscaling of surface urban heat island by incorporating an annual temperature cycle model: A tale of two cities                                                                     | Remote Sensing of Environment                                     | MODIS          | Others                       | Local       | Day and night | All seasons  |
| 318 | 2016 | G. Huang and M. L. Cadenasso                                             | People, landscape, and urban heat island: dynamics among neighborhood social conditions, land cover and surface temperatures                                                                 | Landscape Ecology                                                 | Landsat series | local-scale SUHI variations  | Local       | Daytime       | Summer       |
| 319 | 2016 | H. Kandel, A. Melesse and D. Whitman                                     | An analysis on the urban heat island effect using radiosonde profiles and Landsat imagery with ground meteorological data in South Florida                                                   | International Journal of Remote Sensing                           | Landsat series | SUHI variations among cities | Regional    | Daytime       | Summer       |
| 320 | 2016 | N. Kikon, P. Singh, S. K. Singh and A. Vyas                              | Assessment of urban heat islands (UHI) of Noida City, India using multi-temporal satellite data                                                                                              | Sustainable Cities and Society                                    | Landsat series | local-scale SUHI variations  | Local       | Daytime       | Spring       |
| 321 | 2016 | J.-H. Kim, D. Gu, W. Sohn, S.-H. Kil, H. Kim and D.-K. Lee               | Neighborhood Landscape Spatial Patterns and Land Surface Temperature: An Empirical Study on Single-Family Residential Areas in Austin, Texas                                                 | International Journal of Environmental Research and Public Health | Landsat series | local-scale SUHI variations  | Local       | Nighttime     | Summer       |
| 322 | 2016 | X. Li, W. Li, A. Middel, S. L. Harlan, A. J. Brazel and B. L. Turner, II | Remote sensing of the surface urban heat island and land architecture in Phoenix, Arizona: Combined effects of land composition and configuration and cadastral-demographic-economic factors | Remote Sensing of Environment                                     | Landsat series | local-scale SUHI variations  | Local       | Daytime       | Summer       |

| No. | Year | Authors                                                      | Title                                                                                                                                                                                                              | Journal                                                                          | Sensor                | Research foci                | Study scale | Time-of-day   | Study Season           |
|-----|------|--------------------------------------------------------------|--------------------------------------------------------------------------------------------------------------------------------------------------------------------------------------------------------------------|----------------------------------------------------------------------------------|-----------------------|------------------------------|-------------|---------------|------------------------|
| 323 | 2016 | G. Liu, Q. Zhang, G. Li and D. M. Doronzo                    | Response of land cover types to land surface temperature derived from Landsat-5 TM in Nanjing Metropolitan Region, China                                                                                           | Environmental Earth Sciences                                                     | Landsat series        | local-scale SUHI variations  | Local       | Daytime       | Summer                 |
| 324 | 2016 | K. Liu, H. Su, X. Li, W. Wang, L. Yang and H. Liang          | Quantifying Spatial-Temporal Pattern of Urban Heat Island in Beijing: An Improved Assessment Using Land Surface Temperature (LST) Time Series Observations From LANDSAT, MODIS, and Chinese New Satellite GaoFen-1 | Ieee Journal of Selected Topics in Applied Earth Observations and Remote Sensing | Landsat series, MODIS | local-scale SUHI variations  | Local       | Nighttime     | Spring, Summer, Autumn |
| 325 | 2016 | Q. Ma, J. Wu and C. He                                       | A hierarchical analysis of the relationship between urban impervious surfaces and land surface temperatures: spatial scale dependence, temporal variations, and bioclimatic modulation                             | Landscape Ecology                                                                | Landsat series        | SUHI variations among cities | Regional    | Day and night | Summer, Winter         |
| 326 | 2016 | W. Ma, L. Zhou, H. Zhang, Y. Zhang and X. Dai                | Air temperature field distribution estimations over a Chinese mega-city using MODIS land surface temperature data: the case of Shanghai                                                                            | Frontiers of Earth Science                                                       | MODIS                 | surface-air UHIs             | Local       | Day and night | All seasons            |
| 327 | 2016 | W. Mao, X. Wang, J. Cai and M. Zhu                           | Multi-dimensional histogram-based information capacity analysis of urban heat island effect using Landsat 8 data                                                                                                   | Remote Sensing Letters                                                           | Landsat series        | local-scale SUHI variations  | Local       | Daytime       | Spring                 |
| 328 | 2016 | A. Mathew, S. Khandelwal and N. kaul                         | Spatial and temporal variations of urban heat island effect and the effect of percentage impervious surface area and elevation on land surface temperature: Study of Chandigarh city, India                        | Sustainable Cities and Society                                                   | MODIS                 | local-scale SUHI variations  | Local       | Day and night | All seasons            |
| 329 | 2016 | A. Mathew, S. Sreekumar, S. Khandelwal, N. Kaul and R. Kumar | Prediction of surface temperatures for the assessment of urban heat island effect over Ahmedabad city using linear time series model                                                                               | Energy and Buildings                                                             | MODIS                 | Others                       |             | Day and night | Spring, Winter         |
| 330 | 2016 | E. K. Melaas, J. A. Wang, D. L. Miller and M. A. Friedl      | Interactions between urban vegetation and surface urban heat islands: a case study in the Boston metropolitan region                                                                                               | Environmental Research Letters                                                   | Landsat series        | local-scale SUHI variations  | Local       | Daytime       | Spring, Summer         |

| No. | Year | Authors                                                                                | Title                                                                                                                                                   | Journal                                                               | Sensor                | Research foci                | Study scale | Time-of-day   | Study Season            |
|-----|------|----------------------------------------------------------------------------------------|---------------------------------------------------------------------------------------------------------------------------------------------------------|-----------------------------------------------------------------------|-----------------------|------------------------------|-------------|---------------|-------------------------|
| 331 | 2016 | D. Meng, S. Yang, H. Gong, X. Li and J. Zhang                                          | Assessment of thermal environment landscape over five megacities in China based on Landsat 8                                                            | Journal of Applied Remote Sensing                                     | Landsat series        | local-scale SUHI variations  | Local       | Daytime       | Summer, Autumn          |
| 332 | 2016 | M. Morabito, A. Crisci, A. Messeri, S. Orlandini, A. Raschi, G. Maracchi and M. Munafo | The impact of built-up surfaces on land surface temperatures in Italian urban areas                                                                     | Science of the Total Environment                                      | MODIS                 | local-scale SUHI variations  | Local       | Day and night | Autumn, Winter          |
| 333 | 2016 | A. K. Nassar, G. A. Blackburn and J. D. Whyatt                                         | Dynamics and controls of urban heat sink and island phenomena in a desert city: Development of a local climate zone scheme using remotely-sensed inputs | International Journal of Applied Earth Observation and Geoinformation | Landsat series, MODIS | local-scale SUHI variations  | Local       | Day and night | All seasons             |
| 334 | 2016 | L. H. Nguyen and G. M. Henebry                                                         | Urban Heat Islands as Viewed by Microwave Radiometers and Thermal Time Indices                                                                          | Remote Sensing                                                        | AMSR-E, AMSRAH VRR    | SUHI variations among cities | Regional    | Day and night | Spring , Summer ,Autumn |
| 335 | 2016 | Q. Nie, W. Man, Z. Li and Y. Huang                                                     | Spatiotemporal Impact of Urban Impervious Surface on Land Surface Temperature in Shanghai, China                                                        | Canadian Journal of Remote Sensing                                    | Landsat series        | local-scale SUHI variations  | Local       | Daytime       | Spring, Autumn, Winter  |
| 336 | 2016 | Q. Nie, J. Xu and W. Man                                                               | Long-range cross-correlation between urban impervious surfaces and land surface temperatures                                                            | Frontiers of Earth Science                                            | Landsat series        | local-scale SUHI variations  | Local       | Daytime       | Spring, Autumn, Winter  |
| 337 | 2016 | J. Pan                                                                                 | Area Delineation and Spatial-Temporal Dynamics of Urban Heat Island in Lanzhou City, China Using Remote Sensing Imagery                                 | Journal of the Indian Society of Remote Sensing                       | Landsat series        | local-scale SUHI variations  | Local       | Daytime       | Summer                  |
| 338 | 2016 | J. Peng, P. Xie, Y. Liu and J. Ma                                                      | Urban thermal environment dynamics and associated landscape pattern factors: A case study in the Beijing metropolitan region                            | Remote Sensing of Environment                                         | Landsat series        | local-scale SUHI variations  | Local       | Daytime       | All seasons             |
| 339 | 2016 | J. Quan, W. Zhan, Y. Chen, M. Wang and J. Wang                                         | Time series decomposition of remotely sensed land surface temperature and investigation of trends and seasonal variations in surface urban heat islands | Journal of Geophysical Research-Atmospheres                           | MODIS                 | local-scale SUHI variations  | Local       | Nighttime     | All seasons             |
| 340 | 2016 | A. Sekertekin, S. H. Kutoglu and S. Kaya                                               | Evaluation of spatio-temporal variability in Land Surface Temperature: A case study of Zonguldak, Turkey                                                | Environmental Monitoring and Assessment                               | Landsat series        | local-scale SUHI variations  | Local       | Daytime       | Autumn                  |

| No. | Year | Authors                                                                                 | Title                                                                                                                                                                                                 | Journal                                                               | Sensor         | Research foci                | Study scale | Time-of-day   | Study Season |
|-----|------|-----------------------------------------------------------------------------------------|-------------------------------------------------------------------------------------------------------------------------------------------------------------------------------------------------------|-----------------------------------------------------------------------|----------------|------------------------------|-------------|---------------|--------------|
| 341 | 2016 | H. T. Shahraiyini, S. Sodoudi, A. El-Zafarany, T. Abou El Seoud, H. Ashraf and K. Krone | A Comprehensive Statistical Study on Daytime Surface Urban Heat Island during Summer in Urban Areas, Case Study: Cairo and Its New Towns                                                              | Remote Sensing                                                        | Landsat series | local-scale SUHI variations  | Local       | Daytime       | Summer       |
| 342 | 2016 | H. Shen, L. Huang, L. Zhang, P. Wu and C. Zeng                                          | Long-term and fine-scale satellite monitoring of the urban heat island effect by the fusion of multi-temporal and multi-sensor remote sensed data: A 26-year case study of the city of Wuhan in China | Remote Sensing of Environment                                         | Landsat series | local-scale SUHI variations  | Local       | Daytime       | Summer       |
| 343 | 2016 | Y. Song and C. Wu                                                                       | Examining the impact of urban biophysical composition and neighboring environment on surface urban heat island effect                                                                                 | Advances in Space Research                                            | Landsat series | local-scale SUHI variations  | Local       | Daytime       | Summer       |
| 344 | 2016 | M. Tomaszewska and G. M. Henebry                                                        | Urban-Rural Contrasts in Central-Eastern European Cities Using a MODIS 4 Micron Time Series                                                                                                           | Remote Sensing                                                        | MODIS          | Others                       | Local       |               |              |
| 345 | 2016 | L. Tu, Z. Qin, W. Li, J. Geng, L. Yang, S. Zhao, W. Zhan and F. Wang                    | Surface urban heat island effect and its relationship with urban expansion in Nanjing, China                                                                                                          | Journal of Applied Remote Sensing                                     | Landsat series | local-scale SUHI variations  | Local       | Daytime       | Autumn       |
| 346 | 2016 | C. Wang, S. W. Myint, Z. Wang and J. Song                                               | Spatio-Temporal Modeling of the Urban Heat Island in the Phoenix Metropolitan Area: Land Use Change Implications                                                                                      | Remote Sensing                                                        | MODIS          | local-scale SUHI variations  | Local       | Day and night | Summer       |
| 347 | 2016 | J. Wang, Q. Zhan and H. Guo                                                             | The Morphology, Dynamics and Potential Hotspots of Land Surface Temperature at a Local Scale in Urban Areas                                                                                           | Remote Sensing                                                        | MODIS          | local-scale SUHI variations  | Local       | Day and night | All seasons  |
| 348 | 2016 | J. Wang, Q. Zhan, H. Guo and Z. Jin                                                     | Characterizing the spatial dynamics of land surface temperature-impervious surface fraction relationship                                                                                              | International Journal of Applied Earth Observation and Geoinformation | Landsat series | local-scale SUHI variations  | Local       | Daytime       | Spring       |
| 349 | 2016 | K. Ward, S. Lauf, B. Kleinschmit and W. Endlicher                                       | Heat waves and urban heat islands in Europe: A review of relevant drivers                                                                                                                             | Science of the Total Environment                                      | MODIS          | SUHI variations among cities | Regional    | Day and night | Summer       |

| No. | Year | Authors                                                     | Title                                                                                                                                                                 | Journal                                                           | Sensor                | Research foci                | Study scale | Time-of-day   | Study Season   |
|-----|------|-------------------------------------------------------------|-----------------------------------------------------------------------------------------------------------------------------------------------------------------------|-------------------------------------------------------------------|-----------------------|------------------------------|-------------|---------------|----------------|
| 350 | 2016 | M. S. Wong, F. Peng, B. Zou, W. Z. Shi and G. J. Wilson     | Spatially Analyzing the Inequity of the Hong Kong Urban Heat Island by Socio-Demographic Characteristics                                                              | International Journal of Environmental Research and Public Health | Landsat series        | Others                       | Local       | Daytime       | Autumn         |
| 351 | 2016 | S. Zareie, H. Khosravi, A. Nasiri and M. Dastorani          | Using Landsat Thematic Mapper (TM) sensor to detect change in land surface temperature in relation to land use change in Yazd, Iran                                   | Solid Earth                                                       | Landsat series        | local-scale SUHI variations  | Local       | Daytime       | Summer         |
| 352 | 2016 | H. Zhang, X.-M. Jing, J.-Y. Chen, J.-J. Li and B. Schwegler | Characterizing Urban Fabric Properties and Their Thermal Effect Using QuickBird Image and Landsat 8 Thermal Infrared (TIR) Data: The Case of Downtown Shanghai, China | Remote Sensing                                                    | Landsat series        | local-scale SUHI variations  | Local       | Daytime       | Summer         |
| 353 | 2016 | M. Zhao, H. Cai, Z. Qiao and X. Xu                          | Influence of urban expansion on the urban heat island effect in Shanghai                                                                                              | International Journal of Geographical Information Science         | Landsat series        | local-scale SUHI variations  | Local       | Daytime       | Summer, Autumn |
| 354 | 2016 | S. Zhao, D. Zhou and S. Liu                                 | Data concurrency is required for estimating urban heat island intensity                                                                                               | Environmental Pollution                                           | MODIS                 | SUHI variations among cities | Regional    | Day and night | Summer, Winter |
| 355 | 2016 | D. Zhou, L. Zhang, L. Hao, G. Sun, Y. Liu and C. Zhu        | Spatiotemporal trends of urban heat island effect along the urban development intensity gradient in China                                                             | Science of the Total Environment                                  | MODIS                 | SUHI variations among cities | Regional    | Day and night | All seasons    |
| 356 | 2016 | D. Zhou, L. Zhang, D. Li, D. Huang and C. Zhu               | Climate-vegetation control on the diurnal and seasonal variations of surface urban heat islands in China                                                              | Environmental Research Letters                                    | MODIS                 | SUHI variations among cities | Regional    | Day and night | All seasons    |
| 357 | 2016 | Zhou, D., D. Li, G. Sun, L. Zhang, Y. Liu, and L. Hao       | Contrasting effects of urbanization and agriculture on surface temperature in eastern China                                                                           | Journal of Geophysical Research: Atmospheres                      | MODIS                 | SUHI variations among cities | Regional    | Day and night | All seasons    |
| 358 | 2017 | J. M. Ali, S. H. Marsh and M. J. Smitha                     | A comparison between London and Baghdad surface urban heat islands and possible engineering mitigation solution                                                       | Sustainable Cities and Society                                    | Landsat series, AHVRR | local-scale SUHI variations  | Local       | Daytime       | Spring, Summer |
| 359 | 2017 | A. Ayanlade                                                 | Variations in urban surface temperature: an assessment of land use change impacts over Lagos metropolis                                                               | Weather                                                           | MODIS                 | local-scale SUHI variations  | Local       | Day and night | All seasons    |
| 360 | 2017 | B. Bechtel, K. Zaksek, J. Ossenbruegge, G.                  | Towards a satellite based monitoring of urban air temperatures                                                                                                        | Sustainable Cities and Society                                    | 8                     | surface-air UHIs             | Local       | Day and night | All seasons    |

| No. | Year | Authors                                                                         | Title                                                                                                                                              | Journal                                                               | Sensor         | Research foci                | Study scale | Time-of-day | Study Season |
|-----|------|---------------------------------------------------------------------------------|----------------------------------------------------------------------------------------------------------------------------------------------------|-----------------------------------------------------------------------|----------------|------------------------------|-------------|-------------|--------------|
|     |      | Kaveckis and J. Boehner                                                         |                                                                                                                                                    |                                                                       |                |                              |             |             |              |
| 361 | 2017 | N. Benas, N. Chrysoulakis and C. Cartalis                                       | Trends of urban surface temperature and heat island characteristics in the Mediterranean                                                           | Theoretical and Applied Climatology                                   | MODIS          | SUHI variations among cities | Regional    | Nighttime   | Annual mean  |
| 362 | 2017 | C. Berger, J. Rosentreter, M. Voltersen, C. Baumgart, C. Schmullius and S. Hese | Spatio-temporal analysis of the relationship between 2D/3D urban site characteristics and land surface temperature                                 | Remote Sensing of Environment                                         | Landsat series | local-scale SUHI variations  | Local       | Daytime     | All seasons  |
| 363 | 2017 | S. Bonafoni, G. Baldinelli and P. Verducci                                      | Sustainable strategies for smart cities: Analysis of the town development effect on surface urban heat island through remote sensing methodologies | Sustainable Cities and Society                                        | Landsat series | local-scale SUHI variations  | Local       | Daytime     | Summer       |
| 364 | 2017 | S. Bonafoni, G. Baldinelli, P. Verducci and A. Presciutti                       | Remote Sensing Techniques for Urban Heating Analysis: A Case Study of Sustainable Construction at District Level                                   | Sustainability                                                        | Landsat series | local-scale SUHI variations  | Local       | Daytime     | Summer       |
| 365 | 2017 | G. Cai, Y. Liu and M. Du                                                        | Impact of the 2008 Olympic Games on urban thermal environment in Beijing, China from satellite images                                              | Sustainable Cities and Society                                        | Landsat series | local-scale SUHI variations  | Local       | Daytime     | Summer       |
| 366 | 2017 | T. Chen, X. Zhang and R. Niu                                                    | The Relationship between Urban Land Surface Material Fractions and Brightness Temperature Based on MESMA                                           | Remote Sensing                                                        | Landsat series | local-scale SUHI variations  | Local       | Daytime     | Summer       |
| 367 | 2017 | W. Chen, Y. Zhang, C. Pengwang and W. Gao                                       | Evaluation of Urbanization Dynamics and its Impacts on Surface Heat Islands: A Case Study of Beijing, China                                        | Remote Sensing                                                        | Landsat series | local-scale SUHI variations  | Local       | Daytime     | Autumn       |
| 368 | 2017 | X. Chen and Y. Zhang                                                            | Impacts of urban surface characteristics on spatiotemporal pattern of land surface temperature in Kunming of China                                 | Sustainable Cities and Society                                        | Landsat series | local-scale SUHI variations  | Local       | Daytime     | Spring       |
| 369 | 2017 | Y. Chen and S. Yu                                                               | Impacts of urban landscape patterns on urban thermal variations in Guangzhou, China                                                                | International Journal of Applied Earth Observation and Geoinformation | Landsat series | local-scale SUHI variations  | Local       | Daytime     | Autumn       |



| No. | Year | Authors                                                                                                   | Title                                                                                                                                           | Journal                                            | Sensor         | Research foci               | Study scale | Time-of-day   | Study Season   |
|-----|------|-----------------------------------------------------------------------------------------------------------|-------------------------------------------------------------------------------------------------------------------------------------------------|----------------------------------------------------|----------------|-----------------------------|-------------|---------------|----------------|
| 370 | 2017 | Y.-C. Chen, H.-W. Chiu, Y.-F. Su, Y.-C. Wu and K.-S. Cheng                                                | Does urbanization increase diurnal land surface temperature variation? Evidence and implications                                                | Landscape and Urban Planning                       | MODIS          | local-scale SUHI variations | Local       | Day and night | Summer         |
| 371 | 2017 | H. Du, W. Cai, Y. Xu, Z. Wang, Y. Wang and Y. Cai                                                         | Quantifying the cool island effects of urban green spaces using remote sensing Data                                                             | Urban Forestry & Urban Greening                    | Landsat series | local-scale SUHI variations | Local       | Daytime       | Autumn         |
| 372 | 2017 | A. Elmes, J. Rogan, C. Williams, S. Ratick, D. Nowak and D. Martin                                        | Effects of urban tree canopy loss on land surface temperature magnitude and timing                                                              | Isprs Journal of Photogrammetry and Remote Sensing | Landsat series | local-scale SUHI variations | Local       | Daytime       | All seasons    |
| 373 | 2017 | R. C. Estoque and Y. Murayama                                                                             | Monitoring surface urban heat island formation in a tropical mountain city using Landsat data (1987-2015)                                       | Isprs Journal of Photogrammetry and Remote Sensing | Landsat series | local-scale SUHI variations | Local       | Daytime       | Winter         |
| 374 | 2017 | R. C. Estoque, Y. Murayama and S. W. Myint                                                                | Effects of landscape composition and pattern on land surface temperature: An urban heat island study in the megacities of Southeast Asia        | Science of the Total Environment                   | Landsat series | local-scale SUHI variations | Local       | Daytime       | Spring, Autumn |
| 375 | 2017 | C. Fan, S. W. Myint, S. Kaplan, A. Middel, B. Zheng, A. Rahman, H.-P. Huang, A. Brazel and D. G. Blumberg | Understanding the Impact of Urbanization on Surface Urban Heat Islands-A Longitudinal Analysis of the Oasis Effect in Subtropical Desert Cities | Remote Sensing                                     | Landsat series | local-scale SUHI variations | Local       | Daytime       | Summer         |
| 376 | 2017 | E. A. Gage and D. J. Cooper                                                                               | Urban forest structure and land cover composition effects on land surface temperature in a semi-arid suburban area                              | Urban Forestry & Urban Greening                    | Landsat series | local-scale SUHI variations | Local       | Daytime       | Summer         |
| 377 | 2017 | E. A. Gage and D. J. Cooper                                                                               | Relationships between landscape pattern metrics, vertical structure and surface urban Heat Island formation in a Colorado suburb                | Urban Ecosystems                                   | Landsat series | local-scale SUHI variations | Local       | Daytime       | Summer         |
| 378 | 2017 | C. S. Greene and A. A. Millward                                                                           | Getting closure: The role of urban forest canopy density in moderating summer surface temperatures in a large city                              | Urban Ecosystems                                   | Landsat series | local-scale SUHI variations | Local       | Daytime       | Summer         |
| 379 | 2017 | S. Guha, H. Govil and S. Mukherjee                                                                        | Dynamic analysis and ecological evaluation of urban heat islands in Raipur city, India                                                          | Journal of Applied Remote Sensing                  | Landsat series | local-scale SUHI variations | Local       | Daytime       | Spring         |

| No. | Year | Authors                                                           | Title                                                                                                                                            | Journal                                   | Sensor         | Research foci                | Study scale | Time-of-day   | Study Season   |
|-----|------|-------------------------------------------------------------------|--------------------------------------------------------------------------------------------------------------------------------------------------|-------------------------------------------|----------------|------------------------------|-------------|---------------|----------------|
| 380 | 2017 | L. Henits, L. Mucsi and C. M. Liska                               | Monitoring the changes in impervious surface ratio and urban heat island intensity between 1987 and 2011 in Szeged, Hungary                      | Environmental Monitoring and Assessment   | Landsat series | local-scale SUHI variations  | Local       | Daytime       | Summer         |
| 381 | 2017 | M. E. Hereher                                                     | Retrieving spatial variations of land surface temperatures from satellite data - Cairo region, Egypt                                             | Geocarto International                    | MODIS          | local-scale SUHI variations  | Local       | Daytime       | Annual mean    |
| 382 | 2017 | W. Huang, J. Li, Q. Guo, L. R. Mansaray, X. Li and J. Huang       | A Satellite-Derived Climatological Analysis of Urban Heat Island over Shanghai during 2000-2013                                                  | Remote Sensing                            | MODIS          | surface-air UHIs             | Local       | Day and night | All seasons    |
| 383 | 2017 | M. Jain, A. P. Dimri and D. Niyogi                                | Land-Air Interactions over Urban-Rural Transects Using Satellite Observations: Analysis over Delhi, India from 1991-2016                         | Remote Sensing                            | Landsat series | local-scale SUHI variations  | Local       | Daytime       | All seasons    |
| 384 | 2017 | M.-J. Jun, J.-I. Kim, H.-J. Kim, C.-H. Yeo and J.-Y. Hyun         | Effects of Two Urban Development Strategies on Changes in the Land Surface Temperature: Infill versus Suburban New Town Development              | Journal of Urban Planning and Development | Landsat series | local-scale SUHI variations  | Local       | Daytime       | Summer         |
| 385 | 2017 | R. Kumar, V. Mishra, J. Buzan, R. Kumar, D. Shindell and M. Huber | Dominant control of agriculture and irrigation on urban heat island in India                                                                     | Scientific Reports                        | MODIS          | SUHI variations among cities | Regional    | Day and night | All seasons    |
| 386 | 2017 | L. Li, X. Huang, J. Li and D. Wen                                 | Quantifying the Spatiotemporal Trends of Canopy Layer Heat Island (CLHI) and Its Driving Factors over Wuhan, China with Satellite Remote Sensing | Remote Sensing                            | MODIS          | surface-air UHIs             | Local       | Day and night | Summer, Winter |
| 387 | 2017 | W. Li, Q. Cao, K. Lang and J. Wu                                  | Linking potential heat source and sink to urban heat island: Heterogeneous effects of landscape pattern on land surface temperature              | Science of the Total Environment          | Landsat series | local-scale SUHI variations  | Local       | Daytime       | Autumn         |
| 388 | 2017 | X. Li, Y. Zhou, G. R. Asrar, M. Imhoff and X. Li                  | The surface urban heat island response to urban expansion: A panel analysis for the conterminous United States                                   | Science of the Total Environment          | MODIS          | SUHI variations among cities | Regional    | Day and night | All seasons    |
| 389 | 2017 | W. Liao, X. Liu, D. Wang and Y. Sheng                             | The Impact of Energy Consumption on the Surface Urban Heat Island in China's 32 Major Cities                                                     | Remote Sensing                            | MODIS          | SUHI variations among cities | Regional    | Day and night | Annual mean    |

| No. | Year | Authors                                                                  | Title                                                                                                                                                                  | Journal                                                       | Sensor         | Research foci                | Study scale | Time-of-day   | Study Season   |
|-----|------|--------------------------------------------------------------------------|------------------------------------------------------------------------------------------------------------------------------------------------------------------------|---------------------------------------------------------------|----------------|------------------------------|-------------|---------------|----------------|
| 390 | 2017 | W. Liu, J. Feddema, L. Hu, A. Zung and N. Brunsell                       | Seasonal and Diurnal Characteristics of Land Surface Temperature and Major Explanatory Factors in Harris County, Texas                                                 | Sustainability                                                | MODIS          | local-scale SUHI variations  | Local       | Day and night | All seasons    |
| 391 | 2017 | Y. Liu, J. Peng and Y. Wang                                              | Diversification of Land Surface Temperature Change under Urban Landscape Renewal: A Case Study in the Main City of Shenzhen, China                                     | Remote Sensing                                                | Landsat series | local-scale SUHI variations  | Local       | Daytime       | All seasons    |
| 392 | 2017 | A. Majkowska, L. Kolendowicz, M. Polrolniczak, J. Hauke and B. Czernecki | The urban heat island in the city of Poznan as derived from Landsat 5 TM                                                                                               | Theoretical and Applied Climatology                           | Landsat series | surface-air UHIs             | Local       | Daytime       | Spring, Summer |
| 393 | 2017 | A. Mathew, S. Khandelwal and N. Kaul                                     | Investigating spatial and seasonal variations of urban heat island effect over Jaipur city and its relationship with vegetation, urbanization and elevation parameters | Sustainable Cities and Society                                | MODIS          | local-scale SUHI variations  | Local       | Nighttime     | All seasons    |
| 394 | 2017 | V. Miles and I. Esau                                                     | Seasonal and Spatial Characteristics of Urban Heat Islands (UHIs) in Northern West Siberian Cities                                                                     | Remote Sensing                                                | MODIS          | SUHI variations among cities | Regional    | Day and night | All seasons    |
| 395 | 2017 | N. Mostofi and M. Hasanlou                                               | Feature selection of various land cover indices for monitoring Surface Heat Island in Tehran city using Landsat 8 imagery                                              | Journal of Environmental Engineering and Landscape Management | Landsat series | local-scale SUHI variations  | Local       | Daytime       | Summer         |
| 396 | 2017 | S. Mukherjee, P. K. Joshi and R. D. Garg                                 | Analysis of urban built-up areas and surface urban heat island using downscaled MODIS derived land surface temperature data                                            | Geocarto International                                        | MODIS          | SUHI variations among cities | Regional    | Daytime       | Autumn         |
| 397 | 2017 | T. D. Mushore, J. Odindi, T. Dube and O. Mutanga                         | Understanding the relationship between urban outdoor temperatures and indoor air-conditioning energy demand in Zimbabwe                                                | Sustainable Cities and Society                                | Landsat series | local-scale SUHI variations  | Local       | Daytime       | Summer, Winter |
| 398 | 2017 | T. D. Mushore, J. Odindi, T. Dube and O. Mutanga                         | Prediction of future urban surface temperatures using medium resolution satellite data in Harare metropolitan city, Zimbabwe                                           | Building and Environment                                      | Landsat series | local-scale SUHI variations  | Local       | Daytime       | Autumn         |

| No. | Year | Authors                                                                                | Title                                                                                                                                          | Journal                                        | Sensor         | Research foci                | Study scale | Time-of-day   | Study Season   |
|-----|------|----------------------------------------------------------------------------------------|------------------------------------------------------------------------------------------------------------------------------------------------|------------------------------------------------|----------------|------------------------------|-------------|---------------|----------------|
| 399 | 2017 | S. Nguyen-Thanh, C.-F. Chen, C.-R. Chen, T. Bui-Xuan and V. Tran-Hau                   | Assessment of urbanization and urban heat islands in Ho Chi Minh City, Vietnam using Landsat data                                              | Sustainable Cities and Society                 | Landsat series | local-scale SUHI variations  | Local       | Daytime       | Winter         |
| 400 | 2017 | M. Ranagalage, R. C. Estoque and Y. Murayama                                           | An Urban Heat Island Study of the Colombo Metropolitan Area, Sri Lanka, Based on Landsat Data (1997-2017)                                      | Isprs International Journal of Geo-Information | Landsat series | local-scale SUHI variations  | Local       | Daytime       | Winter         |
| 401 | 2017 | A. Rasul, H. Balzter and C. Smith                                                      | Applying a normalized ratio scale technique to assess influences of urban expansion on land surface temperature of the semi-arid city of Erbil | International Journal of Remote Sensing        | Landsat series | local-scale SUHI variations  | Local       | Daytime       | Summer         |
| 402 | 2017 | E. Rivera, X. Antonio-Nemiga, G. Origel-Gutierrez, P. Sarricolea and S. Adame-Martinez | Spatiotemporal analysis of the atmospheric and surface urban heat islands of the Metropolitan Area of Toluca, Mexico                           | Environmental Earth Sciences                   | Landsat series | surface-air UHIs             | Local       | Day and night | All seasons    |
| 403 | 2017 | V. Sagris and M. Sepp                                                                  | Landsat-8 TIRS Data for Assessing Urban Heat Island Effect and Its Impact on Human Health                                                      | Ieee Geoscience and Remote Sensing Letters     | Landsat series | Others                       | Local       | Daytime       | Summer         |
| 404 | 2017 | A. A. Scott, B. Zaitchik, D. W. Waugh and K. O'Meara                                   | Intraurban Temperature Variability in Baltimore                                                                                                | Journal of Applied Meteorology and Climatology | Landsat series | surface-air UHIs             | Local       | Daytime       | Summer         |
| 405 | 2017 | H. Shastri, B. Barik, S. Ghosh, C. Venkataraman and P. Sadavarte                       | Flip flop of Day-night and Summer-Winter Surface Urban Heat Island Intensity in India                                                          | Scientific Reports                             | MODIS          | SUHI variations among cities | Regional    | Day and night | Summer, Winter |
| 406 | 2017 | L. Sheng, X. Tang, H. You, Q. Gu and H. Hu                                             | Comparison of the urban heat island intensity quantified by using air temperature and Landsat land surface temperature in Hangzhou, China      | Ecological Indicators                          | Landsat series | surface-air UHIs             | Local       | Daytime       | All seasons    |
| 407 | 2017 | P. Singh, N. Kikon and P. Verma                                                        | Impact of land use change and urbanization on urban heat island in Lucknow city, Central India. A remote sensing based estimate                | Sustainable Cities and Society                 | Landsat series | local-scale SUHI variations  | Local       | Daytime       | Autumn         |

| No. | Year | Authors                                                                        | Title                                                                                                                                            | Journal                                            | Sensor         | Research foci               | Study scale | Time-of-day   | Study Season           |
|-----|------|--------------------------------------------------------------------------------|--------------------------------------------------------------------------------------------------------------------------------------------------|----------------------------------------------------|----------------|-----------------------------|-------------|---------------|------------------------|
| 408 | 2017 | R. Sun and L. Chen                                                             | Effects of green space dynamics on urban heat islands: Mitigation and diversification                                                            | Ecosystem Services                                 | Landsat series | local-scale SUHI variations | Local       | Daytime       | Summer                 |
| 409 | 2017 | J. Tang, L. Di, J. Xiao, D. Lu and Y. Zhou                                     | Impacts of land use and socioeconomic patterns on urban heat Island                                                                              | International Journal of Remote Sensing            | Landsat series | local-scale SUHI variations | Local       | Daytime       | Summer                 |
| 410 | 2017 | D. X. Tran, F. Pla, P. Latorre-Carmona, S. W. Myint, M. Gaetano and H. V. Kieu | Characterizing the relationship between land use land cover change and land surface temperature                                                  | Isprs Journal of Photogrammetry and Remote Sensing | Landsat series | local-scale SUHI variations | Local       | Daytime       | Spring, Summer         |
| 411 | 2017 | A. Trlica, L. R. Hutya, C. L. Schaaf, A. Erb and J. A. Wang                    | Albedo, Land Cover, and Daytime Surface Temperature Variation Across an Urbanized Landscape                                                      | Earths Future                                      | Landsat series | local-scale SUHI variations | Local       | Daytime       | Summer                 |
| 412 | 2017 | H. Wang, Y. Zhang, J. Y. Tsou and Y. Li                                        | Surface Urban Heat Island Analysis of Shanghai (China) Based on the Change of Land Use and Land Cover                                            | Sustainability                                     | Landsat series | local-scale SUHI variations | Local       | Daytime       | Winter                 |
| 413 | 2017 | J. Wang and W. Ouyang                                                          | Attenuating the surface Urban Heat Island within the Local Thermal Zones through land surface modification                                       | Journal of Environmental Management                | MODIS          | Others                      | Local       | Day and night | Not available          |
| 414 | 2017 | K. Wang, S. Jiang, J. Wang, C. Zhou, X. Wang and X. Lee                        | Comparing the diurnal and seasonal variabilities of atmospheric and surface urban heat islands based on the Beijing urban meteorological network | Journal of Geophysical Research-Atmospheres        | MODIS          | surface-air UHIs            | Local       | Day and night | All seasons            |
| 415 | 2017 | Y. Wang, Q. Zhan and W. Ouyang                                                 | Impact of Urban Climate Landscape Patterns on Land Surface Temperature in Wuhan, China                                                           | Sustainability                                     | Landsat series | local-scale SUHI variations | Local       | Daytime       | Spring, Summer, Autumn |
| 416 | 2017 | A. Wicki and E. Parlow                                                         | Multiple Regression Analysis for Unmixing of Surface Temperature Data in an Urban Environment                                                    | Remote Sensing                                     | Landsat series | local-scale SUHI variations | Local       | Daytime       | All seasons            |
| 417 | 2017 | D. Xu and R. Chen                                                              | Comparison of urban heat island and urban reflection in Nanjing City of China                                                                    | Sustainable Cities and Society                     | Landsat series | local-scale SUHI variations | Local       | Daytime       | All seasons            |
| 418 | 2017 | X. Xu, H. Cai, Z. Qiao, L. Wang, C. Jin, Y. Ge, L. Wang and F. Xu              | Impacts of park landscape structure on thermal environment using QuickBird and Landsat images                                                    | Chinese Geographical Science                       | Landsat series | local-scale SUHI variations | Local       | Daytime       | Summer                 |

| No. | Year | Authors                                                                       | Title                                                                                                                                | Journal                          | Sensor                                       | Research foci                | Study scale | Time-of-day   | Study Season           |
|-----|------|-------------------------------------------------------------------------------|--------------------------------------------------------------------------------------------------------------------------------------|----------------------------------|----------------------------------------------|------------------------------|-------------|---------------|------------------------|
| 419 | 2017 | C. Yang, X. He, R. Wang, F. Yan, L. Yu, K. Bu, J. Yang, L. Chang and S. Zhang | The Effect of Urban Green Spaces on the Urban Thermal Environment and Its Seasonal Variations                                        | Forests                          | Landsat series                               | local-scale SUHI variations  | Local       | Daytime       | All seasons            |
| 420 | 2017 | C. Yang, X. He, F. Yan, L. Yu, K. Bu, J. Yang, L. Chang and S. Zhang          | Mapping the Influence of Land Use/Land Cover Changes on the Urban Heat Island Effect-A Case Study of Changchun, China                | Sustainability                   | Landsat series                               | local-scale SUHI variations  | Local       | Daytime       | Summer, Autumn         |
| 421 | 2017 | C. Yang, X. He, L. Yu, J. Yang, F. Yan, K. Bu, L. Chang and S. Zhang          | The Cooling Effect of Urban Parks and Its Monthly Variations in a Snow Climate City                                                  | Remote Sensing                   | Landsat series                               | local-scale SUHI variations  | Local       | Daytime       | Spring, Summer, Autumn |
| 422 | 2017 | J. Yang, J. Sun, Q. Ge and X. Li                                              | Assessing the impacts of urbanization-associated green space on urban land surface temperature: A case study of Dalian, China        | Urban Forestry & Urban Greening  | Landsat series                               | local-scale SUHI variations  | Local       | Daytime       | Spring, Summer         |
| 423 | 2017 | Q. Yang, X. Huang and J. Li                                                   | Assessing the relationship between surface urban heat islands and landscape patterns across climatic zones in China                  | Scientific Reports               | MODIS                                        | SUHI variations among cities | Regional    | Day and night | All seasons            |
| 424 | 2017 | R. Yao, L. Wang, X. Gui, Y. Zheng, H. Zhang and X. Huang                      | Urbanization Effects on Vegetation and Surface Urban Heat Islands in China's Yangtze River Basin                                     | Remote Sensing                   | MODIS                                        | SUHI variations among cities | Regional    | Day and night | All seasons            |
| 425 | 2017 | R. Yao, L. Wang, X. Huang, Z. Niu, F. Liu and Q. Wang                         | Temporal trends of surface urban heat islands and associated determinants in major Chinese cities                                    | Science of the Total Environment | MODIS                                        | SUHI variations among cities | Regional    | Day and night | All seasons            |
| 426 | 2017 | C. Ye, M. Wang and J. Li                                                      | Derivation of the characteristics of the Surface Urban Heat Island in the Greater Toronto area using thermal infrared remote sensing | Remote Sensing Letters           | Landsat series                               | surface-air UHIs             | Local       | Daytime       | All seasons            |
| 427 | 2017 | Y. Yuan, C. Xi, Q. Jing and N. Felix                                          | Seasonal Variations of the Urban Thermal Environment Effect in a Tropical Coastal City                                               | Advances in Meteorology          | Landsat series, MODIS, HJ- B, Landsat series | local-scale SUHI variations  | Local       | Day and night | All seasons            |

| No. | Year | Authors                                                    | Title                                                                                                                                                  | Journal                                                                          | Sensor                | Research foci                | Study scale | Time-of-day   | Study Season   |
|-----|------|------------------------------------------------------------|--------------------------------------------------------------------------------------------------------------------------------------------------------|----------------------------------------------------------------------------------|-----------------------|------------------------------|-------------|---------------|----------------|
| 428 | 2017 | L. Zhang, Q. Meng, Z. Sun and Y. Sun                       | Spatial and Temporal Analysis of the Mitigating Effects of Industrial Relocation on the Surface Urban Heat Island over China                           | Isprs International Journal of Geo-Information                                   | Landsat series        | local-scale SUHI variations  | Local       | Daytime       | Spring, Autumn |
| 429 | 2017 | X. Zhang, R. C. Estoque and Y. Murayama                    | An urban heat island study in Nanchang City, China based on land surface temperature and social-ecological variables                                   | Sustainable Cities and Society                                                   | Landsat series        | local-scale SUHI variations  | Local       | Daytime       | Autumn         |
| 430 | 2017 | X. Zhang, Y. Hu, G. Jia, M. Hou, Y. Fan, Z. Sun and Y. Zhu | Land surface temperature shaped by urban fractions in megacity region                                                                                  | Theoretical and Applied Climatology                                              | Landsat series, MODIS | local-scale SUHI variations  | Local       | Daytime       | Summer, Autumn |
| 431 | 2017 | X. Zhang, D. Wang, H. Hao, F. Zhang and Y. Hu              | Effects of Land Use/Cover Changes and Urban Forest Configuration on Urban Heat Islands in a Loess Hilly Region: Case Study Based on Yan'an City, China | International Journal of Environmental Research and Public Health                | Landsat series        | local-scale SUHI variations  | Local       | Daytime       | Summer         |
| 432 | 2017 | Y. Zhang, H. Balzter, B. Liu and Y. Chen                   | Analyzing the Impacts of Urbanization and Seasonal Variation on Land Surface Temperature Based on Subpixel Fractional Covers Using Landsat Images      | Ieee Journal of Selected Topics in Applied Earth Observations and Remote Sensing | Landsat series        | local-scale SUHI variations  | Local       | Daytime       | Summer, Autumn |
| 433 | 2017 | Y. Zhang, A. T. Murray and B. L. Turner, II                | Optimizing green space locations to reduce daytime and nighttime urban heat island effects in Phoenix, Arizona                                         | Landscape and Urban Planning                                                     | ASTER                 | local-scale SUHI variations  | Local       | Day and night | Summer         |
| 434 | 2017 | Y. Zhang, Y. Zhan, T. Yu and X. Ren                        | Urban green effects on land surface temperature caused by surface characteristics: A case study of summer Beijing metropolitan region                  | Infrared Physics & Technology                                                    | Landsat series        | local-scale SUHI variations  | Local       | Daytime       | Summer         |
| 435 | 2017 | Z.-Q. Zhao, B.-J. He, L.-G. Li, H.-B. Wang and A. Darko    | Profile and concentric zonal analysis of relationships between land use/land cover and land surface temperature: Case study of Shenyang, China         | Energy and Buildings                                                             | Landsat series        | local-scale SUHI variations  | Local       | Daytime       | Summer         |
| 436 | 2017 | B. Zhou, D. Rybski and J. P. Kropp                         | The role of city size and urban form in the surface urban heat island                                                                                  | Scientific Reports                                                               | MODIS                 | SUHI variations among cities | Regional    | Day and night | All seasons    |
| 437 | 2017 | W. Zhou, J. Wang and M. L. Cadenasso                       | Effects of the spatial configuration of trees on urban heat mitigation: A comparative study                                                            | Remote Sensing of Environment                                                    | Landsat series        | local-scale SUHI variations  | Local       | Daytime       | Summer         |

| No. | Year | Authors                                             | Title                                                                                                                                 | Journal                                      | Sensor                | Research foci                | Study scale | Time-of-day   | Study Season   |
|-----|------|-----------------------------------------------------|---------------------------------------------------------------------------------------------------------------------------------------|----------------------------------------------|-----------------------|------------------------------|-------------|---------------|----------------|
| 438 | 2018 | A. Azhdari, A. Soltani and M. Alidadi               | Urban morphology and landscape structure effect on land surface temperature: Evidence from Shiraz, a semi-arid city                   | Sustainable Cities and Society               | Landsat series        | local-scale SUHI variations  | Local       | Daytime       | All seasons    |
| 439 | 2018 | A. Barat, S. Kumar, P. Kumar and P. P. Sarthi       | Characteristics of Surface Urban Heat Island (SUHI) over the Gangetic Plain of Bihar, India                                           | Asia-Pacific Journal of Atmospheric Sciences | MODIS                 | local-scale SUHI variations  | Local       | Nighttime     | Winter         |
| 440 | 2018 | T. Barbieri, F. Despini and S. Teggi                | A Multi-Temporal Analyses of Land Surface Temperature Using Landsat-8 Data and Open Source Software: The Case Study of Modena, Italy  | Sustainability                               | Landsat series        | local-scale SUHI variations  | Local       | Daytime       | All seasons    |
| 441 | 2018 | Z. Cai, G. Han and M. Chen                          | Do water bodies play an important role in the relationship between urban form and land surface temperature?                           | Sustainable Cities and Society               | Landsat series        | local-scale SUHI variations  | Local       | Daytime       | Summer         |
| 442 | 2018 | S. Chandra, D. Sharma and S. K. Dubey               | Linkage of urban expansion and land surface temperature using geospatial techniques for Jaipur City, India                            | Arabian Journal of Geosciences               | Landsat series        | local-scale SUHI variations  | Local       | Daytime       | Spring, Summer |
| 443 | 2018 | Z. Dai, J.-M. Guldmann and Y. Hu                    | Spatial regression models of park and land-use impacts on the urban heat island in central Beijing                                    | Science of the Total Environment             | Landsat series        | local-scale SUHI variations  | Local       | Daytime       | Autumn         |
| 444 | 2018 | M. Dihkan, F. Karsli, N. Guneroglu and A. Guneroglu | Evaluation of urban heat island effect in Turkey                                                                                      | Arabian Journal of Geosciences               | Landsat series, ASTER | SUHI variations among cities | Regional    | Day and night | Summer         |
| 445 | 2018 | L. Dong, C. Mitra, S. Greer and E. Burt             | The Dynamical Linkage of Atmospheric Blocking to Drought, Heatwave and Urban Heat Island in Southeastern US: A Multi-Scale Case Study | Atmosphere                                   | Landsat series        | Others                       | Local       | Daytime       | Summer         |
| 446 | 2018 | A. Dwivedi and M. V. Khire                          | Application of split- window algorithm to study Urban Heat Island effect in Mumbai through land surface temperature approach          | Sustainable Cities and Society               | Landsat series        | local-scale SUHI variations  | Local       | Daytime       | Summer, Winter |
| 447 | 2018 | A. Gaur, M. K. Eichenbaum and S. P. Simonovic       | Analysis and modelling of surface Urban Heat Island in 20 Canadian cities under climate and land-cover change                         | Journal of environmental management          | MODIS                 | SUHI variations among cities | Regional    | Day and night | All seasons    |



| No. | Year | Authors                                                                                    | Title                                                                                                                                             | Journal                                            | Sensor         | Research foci                | Study scale | Time-of-day   | Study Season   |
|-----|------|--------------------------------------------------------------------------------------------|---------------------------------------------------------------------------------------------------------------------------------------------------|----------------------------------------------------|----------------|------------------------------|-------------|---------------|----------------|
| 448 | 2018 | R. Gautam and M. K. Singh                                                                  | Urban Heat Island Over Delhi Punches Holes in Widespread Fog in the Indo-Gangetic Plains                                                          | Geophysical Research Letters                       | MODIS          | Others                       | Local       | Nighttime     | Winter         |
| 449 | 2018 | I. Herbel, A.-E. Croitoru, A. V. Rus, C. F. Rosca, G. V. Harpa, A.-F. Ciupertea and I. Rus | The impact of heat waves on surface urban heat island and local economy in Cluj-Napoca city, Romania                                              | Theoretical and Applied Climatology                | Landsat series | Others                       | Local       | Daytime       | Summer         |
| 450 | 2018 | C. Keeratikasikorn and S. Bonafoni                                                         | Satellite Images and Gaussian Parameterization for an Extensive Analysis of Urban Heat Islands in Thailand                                        | Remote Sensing                                     | MODIS          | SUHI variations among cities | Regional    | Day and night | Summer, Winter |
| 451 | 2018 | C. Keeratikasikorn and S. Bonafoni                                                         | Urban Heat Island Analysis over the Land Use Zoning Plan of Bangkok by Means of Landsat 8 Imagery                                                 | Remote Sensing                                     | Landsat series | local-scale SUHI variations  | Local       | Daytime       | Winter         |
| 452 | 2018 | J. Lai, W. Zhan, F. Huang, J. Quan, L. Hu, L. Gao and W. Ju                                | Does quality control matter? Surface urban heat island intensity variations estimated by satellite-derived land surface temperature products      | Isprs Journal of Photogrammetry and Remote Sensing | MODIS          | SUHI variations among cities | Regional    | Day and night | All seasons    |
| 453 | 2018 | B. Li, W. Wang, L. Bai, W. Wang and N. Chen                                                | Effects of spatio-temporal landscape patterns on land surface temperature: a case study of Xi'an city, China                                      | Environmental Monitoring and Assessment            | Landsat series | local-scale SUHI variations  | Local       | Daytime       | Summer         |
| 454 | 2018 | H. Li, F. Meier, X. Lee, T. Chakraborty, J. Liu, M. Schaap and S. Sodoudi                  | Interaction between urban heat island and urban pollution island during summer in Berlin                                                          | Science of the total environment                   | MODIS          | Others                       | Local       | Day and night | Summer         |
| 455 | 2018 | H. Li, Y. Zhou, X. Li, L. Meng, X. Wang, S. Wu and S. Sodoudi                              | A new method to quantify surface urban heat island intensity                                                                                      | Science of the Total Environment                   | MODIS          | Others                       | Local       | Day and night | All seasons    |
| 456 | 2018 | H. Liu, Q. Zhan, C. Yang and J. Wang                                                       | Characterizing the Spatio-Temporal Pattern of Land Surface Temperature through Time Series Clustering: Based on the Latent Pattern and Morphology | Remote Sensing                                     | MODIS          | Others                       | Local       | Daytime       | Summer         |
| 457 | 2018 | Y. Liu, X. Fang, Y. Xu, S. Zhang and Q. Luan                                               | Assessment of surface urban heat island across China's three main urban agglomerations                                                            | Theoretical and Applied Climatology                | MODIS          | SUHI variations among cities | Regional    | Day and night | All seasons    |

| No. | Year | Authors                                                                                          | Title                                                                                                                                                         | Journal                                 | Sensor         | Research foci               | Study scale | Time-of-day   | Study Season   |
|-----|------|--------------------------------------------------------------------------------------------------|---------------------------------------------------------------------------------------------------------------------------------------------------------------|-----------------------------------------|----------------|-----------------------------|-------------|---------------|----------------|
| 458 | 2018 | Y. Liu, J. Peng and Y. Wang                                                                      | Application of partial least squares regression in detecting the important landscape indicators determining urban land surface temperature variation          | Landscape Ecology                       | Landsat series | local-scale SUHI variations | Local       | Daytime       | Autumn         |
| 459 | 2018 | M. Madanian, A. R. Soffianian, S. S. Koupai, S. Pourmanafi and M. Momeni                         | Analyzing the effects of urban expansion on land surface temperature patterns by landscape metrics: a case study of Isfahan city, Iran                        | Environmental Monitoring and Assessment | Landsat series | local-scale SUHI variations | Local       | Daytime       | Summer         |
| 460 | 2018 | M. Madanian, A. R. Soffianian, S. S. Koupai, S. Pourmanafi and M. Momeni                         | The study of thermal pattern changes using Landsat-derived land surface temperature in the central part of Isfahan province                                   | Sustainable Cities and Society          | Landsat series | local-scale SUHI variations | Local       | Daytime       | Summer, Winter |
| 461 | 2018 | F. Marzban, S. Sodoudi and R. Preusker                                                           | The influence of land-cover type on the relationship between NDVI-LST and LST-T-air                                                                           | International Journal of Remote Sensing | MODIS          | surface-air UHIs            | Local       | Day and night | All seasons    |
| 462 | 2018 | A. Mathew, S. Khandelwal and N. Kaul                                                             | Investigating spatio-temporal surface urban heat island growth over Jaipur city using geospatial techniques                                                   | Sustainable Cities and Society          | MODIS          | local-scale SUHI variations | Local       | Day and night | All seasons    |
| 463 | 2018 | A. Mathew, S. Khandelwal and N. Kaul                                                             | Analysis of diurnal surface temperature variations for the assessment of surface urban heat island effect over Indian cities                                  | Energy and Buildings                    | MODIS          | local-scale SUHI variations | Local       | Day and night | All seasons    |
| 464 | 2018 | A. Mathew, S. Khandelwal, N. Kaul and S. Chauhan                                                 | Analyzing the diurnal variations of land surface temperatures for surface urban heat island studies: Is time of observation of remote sensing data important? | Sustainable Cities and Society          | MODIS          | Others                      | Local       | Day and night | All seasons    |
| 465 | 2018 | Q. Meng, L. Zhang, Z. Sun, F. Meng, L. Wang and Y. Sun                                           | Characterizing spatial and temporal trends of surface urban heat island effect in an urban main built-up area: A 12-year case study in Beijing, China         | Remote Sensing of Environment           | MODIS          | local-scale SUHI variations | Local       | Day and night | All seasons    |
| 466 | 2018 | M. Morabito, A. Crisci, T. Georgiadis, S. Orlandini, M. Munafo, L. Congedo, P. Rota and M. Zazzi | Urban Imperviousness Effects on Summer Surface Temperatures Nearby Residential Buildings in Different Urban Zones of Parma                                    | Remote Sensing                          | ASTER          | local-scale SUHI variations | Local       | Day and night | Summer         |

| No. | Year | Authors                                                                          | Title                                                                                                                                                                    | Journal                                                               | Sensor         | Research foci                | Study scale | Time-of-day   | Study Season |
|-----|------|----------------------------------------------------------------------------------|--------------------------------------------------------------------------------------------------------------------------------------------------------------------------|-----------------------------------------------------------------------|----------------|------------------------------|-------------|---------------|--------------|
| 467 | 2018 | S. Naeem, C. Cao, W. A. Qazi, M. Zamani, C. Wei, B. K. Acharya and A. U. Rehman  | Studying the Association between Green Space Characteristics and Land Surface Temperature for Sustainable Urban Environments: An Analysis of Beijing and Islamabad       | Isprs International Journal of Geo-Information                        | Landsat series | local-scale SUHI variations  | Local       | Daytime       | Autumn       |
| 468 | 2018 | S. Nguyen-Thanh and T. Bui-Xuan                                                  | Decadal assessment of urban sprawl and its effects on local temperature using Landsat data in Cantho city, Vietnam                                                       | Sustainable Cities and Society                                        | Landsat series | local-scale SUHI variations  | Local       | Daytime       | Spring       |
| 469 | 2018 | A. Nurwanda and T. Honjo                                                         | Analysis of Land Use Change and Expansion of Surface Urban Heat Island in Bogor City by Remote Sensing                                                                   | Isprs International Journal of Geo-Information                        | Landsat series | local-scale SUHI variations  | Local       | Daytime       | Summer       |
| 470 | 2018 | I. R. Orimoloye, S. P. Mazinyo, W. Nel and A. M. Kalumba                         | Spatiotemporal monitoring of land surface temperature and estimated radiation using remote sensing: human health implications for East London, South Africa              | Environmental Earth Sciences                                          | Landsat series | local-scale SUHI variations  | Local       | Daytime       | Summer       |
| 471 | 2018 | J. Peng, J. Jia, Y. Liu, H. Li and J. Wu                                         | Seasonal contrast of the dominant factors for spatial distribution of land surface temperature in urban areas                                                            | Remote Sensing of Environment                                         | Landsat series | local-scale SUHI variations  | Local       | Daytime       | All seasons  |
| 472 | 2018 | J. Peng, J. Ma, Q. Liu, Y. Liu, Y. n. Hu, Y. Li and Y. Yue                       | Spatial-temporal change of land surface temperature across 285 cities in China: An urban-rural contrast perspective                                                      | Science of the Total Environment                                      | MODIS          | SUHI variations among cities | Regional    | Day and night | All seasons  |
| 473 | 2018 | L. d. F. Peres, A. J. de Lucena, O. C. Rotunno Filho and J. R. de Almeida Franca | The urban heat island in Rio de Janeiro, Brazil, in the last 30 years using remote sensing data                                                                          | International Journal of Applied Earth Observation and Geoinformation | Landsat series | local-scale SUHI variations  | Local       | Daytime       | Annual mean  |
| 474 | 2018 | M. Ranagalage, R. C. Estoque, X. Zhang and Y. Murayama                           | Spatial Changes of Urban Heat Island Formation in the Colombo District, Sri Lanka: Implications for Sustainability Planning                                              | Sustainability                                                        | Landsat series | local-scale SUHI variations  | Local       | Daytime       | Winter       |
| 475 | 2018 | Y. Rao, Y. Xu, J. Zhang, Y. Guo and M. Fu                                        | Does subclassified industrial land have a characteristic impact on land surface temperatures? Evidence for and implications of coal and steel processing industries in a | Ecological Indicators                                                 | Landsat series | Others                       | Local       | Daytime       | Summer       |

| No. | Year | Authors                                                  | Title                                                                                                                                                                                | Journal                              | Sensor         | Research foci               | Study scale | Time-of-day   | Study Season           |
|-----|------|----------------------------------------------------------|--------------------------------------------------------------------------------------------------------------------------------------------------------------------------------------|--------------------------------------|----------------|-----------------------------|-------------|---------------|------------------------|
|     |      |                                                          | Chinese mining city                                                                                                                                                                  |                                      |                |                             |             |               |                        |
| 476 | 2018 | J. S. Silva, R. M. da Silva and C. A. Guimaraes Santos   | Spatiotemporal impact of land use/land cover changes on urban heat islands: A case study of Paco do Lumiar, Brazil                                                                   | Building and Environment             | Landsat series | local-scale SUHI variations | Local       | Daytime       | Spring, Summer, Autumn |
| 477 | 2018 | Y. Sun, C. Gao, J. Li, W. Li and R. Ma                   | Examining urban thermal environment dynamics and relations to biophysical composition and configuration and socio-economic factors: A case study of the Shanghai metropolitan region | Sustainable Cities and Society       | Landsat series | local-scale SUHI variations | Local       | Day and night | All seasons            |
| 478 | 2018 | Y. Tang, C. Lan and H. Feng                              | Effect analysis of land-use pattern with landscape metrics on an urban heat island                                                                                                   | Journal of Applied Remote Sensing    | Landsat series | local-scale SUHI variations | Local       | Daytime       | Autumn                 |
| 479 | 2018 | M. Tarawally, W. Xu, W. Hou and T. D. Mushore            | Comparative Analysis of Responses of Land Surface Temperature to Long-Term Land Use/Cover Changes between a Coastal and Inland City: A Case of Freetown and Bo Town in Sierra Leone  | Remote Sensing                       | Landsat series | local-scale SUHI variations | Local       | Daytime       | Summer                 |
| 480 | 2018 | C. Wang, S. W. Myint, P. Fan, M. Stuhlmacher and J. Yang | The impact of urban expansion on the regional environment in Myanmar: a case study of two capital cities                                                                             | Landscape Ecology                    | MODIS          | local-scale SUHI variations | Local       | Day and night | Annual mean            |
| 481 | 2018 | S. Wang, Q. Ma, H. Ding and H. Liang                     | Detection of urban expansion and land surface temperature change using multi-temporal landsat images                                                                                 | Resources Conservation and Recycling | Landsat series | local-scale SUHI variations | Local       | Daytime       | Spring                 |
| 482 | 2018 | X. Wang, H. Cheng, J. Xi, G. Yang and Y. Zhao            | Relationship between Park Composition, Vegetation Characteristics and Cool Island Effect                                                                                             | Sustainability                       | Landsat series | local-scale SUHI variations | Local       | Daytime       | Spring                 |
| 483 | 2018 | Y. Wang, H. Du, Y. Xu, D. Lu, X. Wang and Z. Guo         | Temporal and spatial variation relationship and influence factors on surface urban heat island and ozone pollution in the Yangtze River Delta, China                                 | Science of the Total Environment     | MODIS          | Others                      | Regional    | Daytime       | All seasons            |

| No. | Year | Authors                                                                         | Title                                                                                                                              | Journal                                                           | Sensor                | Research foci                | Study scale | Time-of-day   | Study Season   |
|-----|------|---------------------------------------------------------------------------------|------------------------------------------------------------------------------------------------------------------------------------|-------------------------------------------------------------------|-----------------------|------------------------------|-------------|---------------|----------------|
| 484 | 2018 | Y.-C. Wang, B. K. H. Hu, S. W. Myint, C.-C. Feng, W. T. L. Chow and P. F. Passy | Patterns of land change and their potential impacts on land surface temperature change in Yangon, Myanmar                          | Science of the total environment                                  | Landsat series, MODIS | local-scale SUHI variations  | Local       | Day and night | Spring, Winter |
| 485 | 2018 | H. Xiao, M. Kopecka, S. Guo, Y. Guan, D. Cai, C. Zhang, X. Zhang and W. Yao     | Responses of Urban Land Surface Temperature on Land Cover: A Comparative Study of Vienna and Madrid                                | Sustainability                                                    | Landsat series        | local-scale SUHI variations  | Local       | Daytime       | Summer         |
| 486 | 2018 | R. Yao, L. Wang, X. Huang, Y. Niu, Y. Chen and Z. Niu                           | The influence of different data and method on estimating the surface urban heat island intensity                                   | Ecological Indicators                                             | MODIS                 | Others                       | Regional    | Day and night | Summer         |
| 487 | 2018 | R. Yao, L. Wang, X. Huang, W. Zhang, J. Li and Z. Niu                           | Interannual variations in surface urban heat island intensity and associated drivers in China                                      | Journal of Environmental Management                               | MODIS                 | SUHI variations among cities | Regional    | Day and night | Summer, Winter |
| 488 | 2018 | C. Yin, M. Yuan, Y. Lu, Y. Huang and Y. Liu                                     | Effects of urban form on the urban heat island effect based on spatial regression model                                            | Science of the Total Environment                                  | Landsat series        | local-scale SUHI variations  | Local       | Daytime       | Autumn         |
| 489 | 2018 | Z. Yu, X. Guo, Y. Zeng, M. Koga and H. Vejre                                    | Variations in land surface temperature and cooling efficiency of green space in rapid urbanization: The case of Fuzhou city, China | Urban Forestry & Urban Greening                                   | Landsat series        | local-scale SUHI variations  | Local       | Daytime       | Summer         |
| 490 | 2018 | Y. Zhang, P. Jiang, H. Zhang and P. Cheng                                       | Study on Urban Heat Island Intensity Level Identification Based on an Improved Restricted Boltzmann Machine                        | International Journal of Environmental Research and Public Health | Landsat series        | Others                       | Local       | Daytime       | Summer         |
| 491 | 2018 | Y. Zhang and S. Liang                                                           | Impacts of land cover transitions on surface temperature in China based on satellite observations                                  | Environmental Research Letters                                    | MODIS                 | SUHI variations among cities | Regional    | Day and night | Annual mean    |
| 492 | 2018 | D. Zhou, S. Bonafoni, L. Zhang and R. Wang                                      | Remote sensing of the urban heat island effect in a highly populated urban agglomeration area in East China                        | Science of the Total Environment                                  | MODIS                 | SUHI variations among cities | Regional    | Day and night | All seasons    |

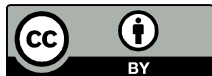

Supplement: s1 [file s1]
